# Supplementary material for: Quantum chemical and kinetic study of the reaction between CCl2 and NO2 radicals
Source: Royal Society of Chemistry journal article supplement (doi:10.1039/d4cp03168g), 2024-12-24
Supplement: d4cp03168g2.pdf [file d4cp03168g2.pdf]

## **Supplementary Information**

**for**

# **Quantum chemical and kinetic study of the reaction between CCl<sub>2</sub> and NO<sub>2</sub> radicals**

Nicolás D. Gómez\*, María P. Badenes, María E. Tucceri, Carlos J. Cobos

Instituto de Investigaciones Fisicoquímicas Teóricas y Aplicadas (INIFTA).

Departamento de Química. Facultad de Ciencias Exactas. Universidad Nacional de La

Plata. CCT La Plata-CONICET. Casilla de Correo 16. Sucursal 4. (1900) La Plata.

Argentina. [nicodgomez@inifta.unlp.edu.ar](mailto:nicodgomez@inifta.unlp.edu.ar)

## Description of the G4//DFT chemistry model

The steps used in the implementation of the G4//DFT/6-311+G(3df) model chemistry are as follows [1].

- (1) The equilibrium structure is obtained at the DFT/6-311+G(3df) level.
- (2) The DFT/6-311+G(3df) equilibrium structure is used to calculate harmonic frequencies.
- (3) The DFT/6-311+G(3df) equilibrium structure is used in a series of single point calculations.
  - (a) Hartree-Fock energy limit:

$$E_{HF/aug-cc-pVnZ} = E_{HF/limit} + B \exp(-\alpha n)$$

- (b) Correction for diffuse functions,

$$\Delta E(+) = E[MP4/6 - 31 + G(d)] - E[MP4/6 - 31G(d)]$$

- (c) Correction for higher polarization functions,

$$\Delta E(2df, p) = E[MP4/6 - 31G(2df, p)] - E[MP4/6 - 31G(d)]$$

- (d) Correction for correlation effects,

$$\Delta E(CC) = E[CCSD(T) - 31G(d)] - E[MP4/6 - 31G(d)]$$

- (e)  $\Delta E(G3LargeXP) = E[MP2/G3LargeXP] - E[MP2/6 - 31G(2df, p)] - E[MP2/6 - 31 + G(d)] + E[MP2/6 - 31G(d)]$

And the combined energy is given by,

$$E_0(G4) = E_e(G4) + E(DFT/6 - 311 + G(3df) ZPE)$$

Where

$$E_e(G4) = E[MP4/6 - 31G(d)] + \Delta E(+) + \Delta E(2df, p) + \Delta E(CC) \\ + \Delta E(G3LargeXP) + \Delta E(HF) + \Delta E(SO) + E(HLC)$$

$\Delta E(SO)$  is the spin-orbit correction factor for atomic species,  $E(HLC)$  is a high level correction factor and  $\Delta E(HF) = E(HF/limit) - E(HF/G3LargeXP)$ .

**Table S1.** Molecular parameters (bond lengths in Å and bond angles in degrees), harmonic vibrational frequencies (in  $\text{cm}^{-1}$ ) and rotational constants (in  $\text{cm}^{-1}$ ) for species of Figure 1, computed at the M11-L/6-311+G(3df) level of theory. Energy (in hartree) calculated with the G4//M11-L/6-311+G(3df) chemistry model and spin degeneracies.

| Parameter                                                                                      | Value                                            |                                         |        |
|------------------------------------------------------------------------------------------------|--------------------------------------------------|-----------------------------------------|--------|
| r(CCl <sub>1</sub> )                                                                           | 1.705                                            |                                         |        |
| r(CCl <sub>2</sub> )                                                                           | 1.705                                            |                                         |        |
| ∠(Cl <sub>1</sub> CCl <sub>2</sub> )                                                           | 109.3                                            |                                         |        |
| 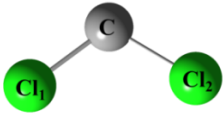            |                                                  |                                         |        |
| <b>Rotational constants:</b> 1.690, 0.125, 0.116                                               |                                                  |                                         |        |
| <b>Vibrational frequencies:</b> 336, 736, 755                                                  |                                                  |                                         |        |
| <b>Energy (Electronic+ZPE):</b> -958.140519 (Singlet)                                          |                                                  |                                         |        |
| Parameter                                                                                      | Value                                            | Parameter                               | Value  |
| r(CCl <sub>1</sub> )                                                                           | 1.644                                            | r(NC)                                   | 1.415  |
| r(CCl <sub>2</sub> )                                                                           | 1.644                                            | r(NO <sub>1</sub> )                     | 1.199  |
| ∠(Cl <sub>1</sub> CCl <sub>2</sub> )                                                           | 122.1                                            | r(NO <sub>2</sub> )                     | 1.199  |
|              |                                                  | ∠(NCCl <sub>1</sub> )                   | 119.0  |
|                                                                                                |                                                  | ∠(O <sub>1</sub> NC)                    | 116.5  |
|                                                                                                |                                                  | ∠(O <sub>2</sub> NC)                    | 116.5  |
|                                                                                                |                                                  | DIH(NCCl <sub>1</sub> Cl <sub>2</sub> ) | 180.0  |
|                                                                                                |                                                  | DIH(O <sub>1</sub> NCCl <sub>1</sub> )  | 0.05   |
|                                                                                                |                                                  | DIH(O <sub>2</sub> NCCl <sub>1</sub> )  | 180.0  |
|                                                                                                | <b>Rotational constants:</b> 0.093, 0.089, 0.046 |                                         |        |
| <b>Vibrational frequencies:</b> 95, 233, 247, 290, 475, 502, 709, 813, 1105, 1115, 1378, 1682  |                                                  |                                         |        |
| <b>Energy (Electronic+ZPE):</b> -1163.220000 (Doublet)                                         |                                                  |                                         |        |
| Parameter                                                                                      | Value                                            | Parameter                               | Value  |
| r(CCl <sub>1</sub> )                                                                           | 1.659                                            | r(NC)                                   | 1.355  |
| r(CCl <sub>2</sub> )                                                                           | 1.669                                            | r(NO <sub>1</sub> )                     | 1.332  |
| ∠(Cl <sub>1</sub> CCl <sub>2</sub> )                                                           | 118.1                                            | r(NO <sub>2</sub> )                     | 1.205  |
|             |                                                  | ∠(NCCl <sub>1</sub> )                   | 121.2  |
|                                                                                                |                                                  | ∠(O <sub>1</sub> NC)                    | 85.9   |
|                                                                                                |                                                  | ∠(O <sub>2</sub> NC)                    | 130.3  |
|                                                                                                |                                                  | DIH(NCCl <sub>1</sub> Cl <sub>2</sub> ) | -168.8 |
|                                                                                                |                                                  | DIH(O <sub>1</sub> NCCl <sub>1</sub> )  | -83.1  |
|                                                                                                |                                                  | DIH(O <sub>2</sub> NCCl <sub>1</sub> )  | 139.3  |
|                                                                                                | <b>Rotational constants:</b> 0.098 0.079 0.051   |                                         |        |
| <b>Vibrational frequencies:</b> 936i, 145, 216, 288, 348, 467, 496, 663, 957, 1101, 1200, 1603 |                                                  |                                         |        |
| <b>Energy (Electronic+ZPE):</b> -1163.159148 (Doublet)                                         |                                                  |                                         |        |

**Table S1 (cont.).** Molecular parameters (bond lengths in Å and bond angles in degrees), harmonic vibrational frequencies (in  $\text{cm}^{-1}$ ) and rotational constants (in  $\text{cm}^{-1}$ ) for species of Figure 1, computed at the M11-L/6-311+G(3df). Energy (in hartree) calculated with the G4//M11-L/6-311+G(3df) chemistry model.

| Parameter                                                                                    | Value | Parameter                        | Value                                           |        |
|----------------------------------------------------------------------------------------------|-------|----------------------------------|-------------------------------------------------|--------|
| $r(\text{CCl}_1)$                                                                            | 1.696 | $r(\text{CO}_1)$                 | 2.346                                           |        |
| $r(\text{CCl}_2)$                                                                            | 1.699 | $r(\text{NO}_1)$                 | 1.178                                           |        |
| $\angle(\text{Cl}_1\text{CCl}_2)$                                                            | 110.8 | $r(\text{NO}_2)$                 | 1.167                                           |        |
| 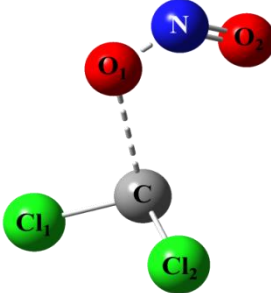            |       | $\angle(\text{Cl}_1\text{CO}_1)$ | 101.0                                           |        |
|                                                                                              |       |                                  | $\angle(\text{CO}_1\text{N})$                   | 103.9  |
|                                                                                              |       |                                  | $\angle(\text{O}_1\text{NO}_2)$                 | 130.2  |
|                                                                                              |       |                                  | $\text{DIH}(\text{Cl}_2\text{Cl}_1\text{CO}_1)$ | -106.4 |
|                                                                                              |       |                                  | $\text{DIH}(\text{Cl}_1\text{CO}_1\text{N})$    | -146.2 |
|                                                                                              |       |                                  | $\text{DIH}(\text{CO}_1\text{NO}_2)$            | -0.5   |
| <b>Rotational constants:</b> 0.103, 0.050, 0.038                                             |       |                                  |                                                 |        |
| <b>Vibrational frequencies:</b> 89i, 19, 83, 112, 176, 242, 339, 669, 762, 793, 1405, 1772   |       |                                  |                                                 |        |
| <b>Energy (Electronic+ZPE):</b> -1163.155428 (Doublet)                                       |       |                                  |                                                 |        |
| Parameter                                                                                    | Value | Parameter                        | Value                                           |        |
| $r(\text{CCl}_1)$                                                                            | 1.687 | $r(\text{CO}_1)$                 | 1.997                                           |        |
| $r(\text{CCl}_2)$                                                                            | 1.693 | $r(\text{NO}_1)$                 | 1.209                                           |        |
| $\angle(\text{Cl}_1\text{CCl}_2)$                                                            | 113.8 | $r(\text{NO}_2)$                 | 1.173                                           |        |
|           |       | $\angle(\text{Cl}_1\text{CO}_1)$ | 98.9                                            |        |
|                                                                                              |       |                                  | $\angle(\text{CO}_1\text{N})$                   | 109.2  |
|                                                                                              |       |                                  | $\angle(\text{O}_1\text{NO}_2)$                 | 124.7  |
|                                                                                              |       |                                  | $\text{DIH}(\text{Cl}_2\text{Cl}_1\text{CO}_1)$ | 108.5  |
|                                                                                              |       |                                  | $\text{DIH}(\text{Cl}_1\text{CO}_1\text{N})$    | -154.7 |
|                                                                                              |       |                                  | $\text{DIH}(\text{CO}_1\text{NO}_2)$            | 175.6  |
| <b>Rotational constants:</b> 0.121, 0.049, 0.036                                             |       |                                  |                                                 |        |
| <b>Vibrational frequencies:</b> 578i, 75, 105, 187, 232, 294, 338, 603, 811, 867, 1186, 1680 |       |                                  |                                                 |        |
| <b>Energy (Electronic+ZPE):</b> -1163.131190 (Doublet)                                       |       |                                  |                                                 |        |

**Table S1 (cont.).** Molecular parameters (bond lengths in Å and bond angles in degrees), harmonic vibrational frequencies (in  $\text{cm}^{-1}$ ) and rotational constants (in  $\text{cm}^{-1}$ ) for species of Figure 1, computed at the M11-L/6-311+G(3df). Energy (in hartree) calculated with the G4//M11-L/6-311+G(3df) chemistry model.

| Parameter                                                                                         | Value | Parameter                                      | Value  |
|---------------------------------------------------------------------------------------------------|-------|------------------------------------------------|--------|
| $r(\text{CCl}_1)$                                                                                 | 1.689 | $r(\text{CO}_1)$                               | 1.334  |
| $r(\text{CCl}_2)$                                                                                 | 1.687 | $r(\text{CO}_2)$                               | 1.797  |
| $\angle(\text{Cl}_1\text{CCl}_2)$                                                                 | 114.5 | $r(\text{NO}_2)$                               | 1.245  |
| 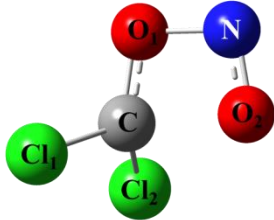                 |       | $\angle(\text{Cl}_1\text{CO}_1)$               | 113.8  |
|                                                                                                   |       | $\angle(\text{O}_1\text{CO}_2)$                | 79.1   |
|                                                                                                   |       | $\angle(\text{CO}_2\text{N})$                  | 83.6   |
|                                                                                                   |       | $\text{DIH}(\text{C}_2\text{Cl}_1\text{CO}_1)$ | 142.0  |
|                                                                                                   |       | $\text{DIH}(\text{Cl}_1\text{O}_1\text{CO}_2)$ | -125.9 |
|                                                                                                   |       | $\text{DIH}(\text{O}_1\text{CO}_2\text{N})$    | 4.0    |
| <b>Rotational constants:</b> 0.102, 0.084, 0.055                                                  |       |                                                |        |
| <b>Vibrational frequencies:</b> 1292i, 141.6, 227, 297, 316, 442, 526, 665, 891, 1004, 1110, 1233 |       |                                                |        |
| <b>Energy (Electronic+ZPE):</b> -1163.178187 (Doublet)                                            |       |                                                |        |
| Parameter                                                                                         | Value | Parameter                                      | Value  |
| $r(\text{CCl}_1)$                                                                                 | 1.919 | $r(\text{NC})$                                 | 1.734  |
| $r(\text{CCl}_2)$                                                                                 | 1.734 | $r(\text{O}_1\text{C})$                        | 1.369  |
| $\angle(\text{Cl}_1\text{CCl}_2)$                                                                 | 124.7 | $r(\text{O}_2\text{C})$                        | 1.369  |
|                |       | $\angle(\text{NC}\text{Cl}_1)$                 | 110.5  |
|                                                                                                   |       | $\angle(\text{NCO}_1)$                         | 45.8   |
|                                                                                                   |       | $\angle(\text{NCO}_2)$                         | 45.8   |
|                                                                                                   |       | $\text{DIH}(\text{NCl}_1\text{CCl}_2)$         | 180.0  |
|                                                                                                   |       | $\text{DIH}(\text{Cl}_2\text{NCO}_1)$          | 90.0   |
|                                                                                                   |       | $\text{DIH}(\text{Cl}_2\text{NCO}_2)$          | -90.0  |
| <b>Rotational constants:</b> 0.098, 0.094, 0.058                                                  |       |                                                |        |
| <b>Vibrational frequencies:</b> 181, 277, 289, 421, 441, 496, 900, 947, 1020, 1097, 1126, 1196    |       |                                                |        |
| <b>Energy (Electronic+ZPE):</b> -1163.219735 (Doublet)                                            |       |                                                |        |

**Table S1 (cont.).** Molecular parameters (bond lengths in Å and bond angles in degrees), harmonic vibrational frequencies (in  $\text{cm}^{-1}$ ) and rotational constants (in  $\text{cm}^{-1}$ ) for species of Figure 1, computed at the M11-L/6-311+G(3df). Energy (in hartree) calculated with the G4//M11-L/6-311+G(3df) chemistry model.

| Parameter                                                                                     | Value | Parameter                                                                            | Value                                   |        |
|-----------------------------------------------------------------------------------------------|-------|--------------------------------------------------------------------------------------|-----------------------------------------|--------|
| r(CCl <sub>1</sub> )                                                                          | 1.636 | r(CN)                                                                                | 1.292                                   |        |
| r(CCl <sub>2</sub> )                                                                          | 2.173 | r(NO <sub>1</sub> )                                                                  | 1.196                                   |        |
| $\angle(\text{Cl}_1\text{CCl}_2)$                                                             | 139.7 | r(NO <sub>2</sub> )                                                                  | 1.370                                   |        |
| 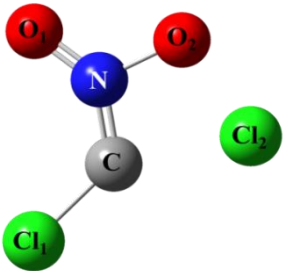             |       | $\angle(\text{Cl}_1\text{CN})$                                                       | 124.8                                   |        |
|                                                                                               |       |                                                                                      | $\angle(\text{CNO}_1)$                  | 134.2  |
|                                                                                               |       |                                                                                      | $\angle(\text{CNO}_2)$                  | 108.5  |
|                                                                                               |       |                                                                                      | DIH(Cl <sub>2</sub> Cl <sub>1</sub> CN) | -129.9 |
|                                                                                               |       |                                                                                      | DIH(Cl <sub>1</sub> CNO <sub>1</sub> )  | -28.0  |
|                                                                                               |       |                                                                                      | DIH(O <sub>1</sub> CNO <sub>2</sub> )   | -172.5 |
| <b>Rotational constants:</b> 0.122, 0.064, 0.042                                              |       |                                                                                      |                                         |        |
| <b>Vibrational frequencies:</b> 735i, 108, 173, 211, 346, 495, 575, 591, 808, 990, 1333, 1714 |       |                                                                                      |                                         |        |
| <b>Energy (Electronic+ZPE):</b> -1163.087271 (Doublet)                                        |       |                                                                                      |                                         |        |
| Parameter                                                                                     | Value |  |                                         |        |
| r(CCl)                                                                                        | 1.611 |                                                                                      |                                         |        |
| r(CN)                                                                                         | 1.157 |                                                                                      |                                         |        |
| r(NO)                                                                                         | 1.172 |                                                                                      |                                         |        |
| $\angle(\text{ClCN})$                                                                         | 151.1 |                                                                                      |                                         |        |
| $\angle(\text{CNO})$                                                                          | 169.3 |                                                                                      |                                         |        |
| DIH(ClCNO)                                                                                    | 180.0 |                                                                                      |                                         |        |
| <b>Rotational constants:</b> 11.681, 0.090, 0.090                                             |       |                                                                                      |                                         |        |
| <b>Vibrational frequencies:</b> 163, 436, 481, 686, 1472, 2420                                |       |                                                                                      |                                         |        |
| <b>Energy (Electronic+ZPE):</b> -627.980445 (Singlet)                                         |       |                                                                                      |                                         |        |

**Table S1 (cont.).** Molecular parameters (bond lengths in Å and bond angles in degrees), harmonic vibrational frequencies (in  $\text{cm}^{-1}$ ) and rotational constants (in  $\text{cm}^{-1}$ ) for species of Figure 1, computed at the M11-L/6-311+G(3df). Energy (in hartree) calculated with the G4//M11-L/6-311+G(3df) chemistry model.

|                                                                                   | Parameter                                        | Value                                                                                |
|-----------------------------------------------------------------------------------|--------------------------------------------------|--------------------------------------------------------------------------------------|
| 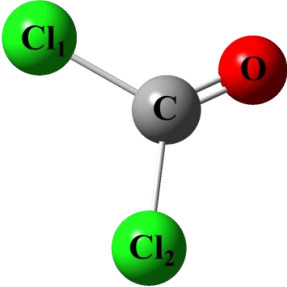 | $r(\text{CO})$                                   | 1.156                                                                                |
|                                                                                   | $r(\text{CCl}_1)$                                | 1.718                                                                                |
|                                                                                   | $r(\text{CCl}_2)$                                | 1.717                                                                                |
|                                                                                   | $\angle(\text{OCCl}_1)$                          | 124.2                                                                                |
|                                                                                   | $\angle(\text{OCCl}_2)$                          | 124.2                                                                                |
|                                                                                   | $\text{DIH}(\text{Cl}_1\text{OCCl}_2)$           | 180.0                                                                                |
|                                                                                   | <b>Rotational constants:</b> 0.272, 0.119, 0.083 |                                                                                      |
| <b>Vibrational frequencies:</b> 313, 459,600, 613, 869, 1956                      |                                                  |                                                                                      |
| <b>Energy (Electronic+ZPE):</b> -1033.447900 (Singlet)                            |                                                  |                                                                                      |
| Parameter                                                                         | Value                                            |                                                                                      |
| $r(\text{NO}_1)$                                                                  | 1.167                                            |   |
| $r(\text{NO}_2)$                                                                  | 1.167                                            |                                                                                      |
| $\angle(\text{O}_1\text{CO}_2)$                                                   | 134.2                                            |                                                                                      |
| <b>Rotational constants:</b> 1.690, 0.125, 0.116                                  |                                                  |                                                                                      |
| <b>Vibrational frequencies:</b> 805, 1474, 1835                                   |                                                  |                                                                                      |
| <b>Energy (Electronic+ZPE):</b> -205.016698 (Doublet)                             |                                                  |                                                                                      |
| Parameter                                                                         | Value                                            |                                                                                      |
| $r(\text{ClO})$                                                                   | 1.533                                            |  |
| <b>Rotational constants:</b> 0.653                                                |                                                  |                                                                                      |
| <b>Vibrational frequencies:</b> 913                                               |                                                  |                                                                                      |
| <b>Energy (Electronic+ZPE):</b> -535.158436 (Doublet)                             |                                                  |                                                                                      |
| Parameter                                                                         | Value                                            |                                                                                      |
| $r(\text{NO})$                                                                    | 1.127                                            |  |
| <b>Rotational constants:</b> 1.778                                                |                                                  |                                                                                      |
| <b>Vibrational frequencies:</b> 2067                                              |                                                  |                                                                                      |
| <b>Energy (Electronic+ZPE):</b> -129.857439 (Doublet)                             |                                                  |                                                                                      |

**Table S2.** Enthalpies of formation (kcal mol<sup>-1</sup>) of CCl<sub>2</sub>NO<sub>2</sub> calculated by isodesmic reactions with the different functionals employed. b: 6-311+G(3df).

| Isodesmic reaction                                                                                                                                   | $\Delta H_f(0\text{ K})$ |          |        |          |          |
|------------------------------------------------------------------------------------------------------------------------------------------------------|--------------------------|----------|--------|----------|----------|
|                                                                                                                                                      | B3LYP/b                  | M08-HX/b | MN15/b | MN15-L/b | PW6B95/b |
| CCl <sub>2</sub> +C <sub>2</sub> H <sub>5</sub> NO <sub>2</sub> → CCl <sub>2</sub> NO <sub>2</sub> +C <sub>2</sub> H <sub>5</sub>                    | 18.0                     | 20.5     | 19.5   | 22.0     | 19.3     |
| CHCl <sub>2</sub> +C <sub>2</sub> H <sub>5</sub> NO <sub>2</sub> → CCl <sub>2</sub> NO <sub>2</sub> +C <sub>2</sub> H <sub>6</sub>                   | 16.9                     | 17.9     | 15.8   | 15.3     | 16.5     |
| 2CH <sub>2</sub> Cl+C <sub>2</sub> H <sub>5</sub> NO <sub>2</sub> → CCl <sub>2</sub> NO <sub>2</sub> +C <sub>2</sub> H <sub>5</sub> +CH <sub>4</sub> | 23.5                     | 25.4     | 22.5   | 20.7     | 23.0     |
| 2CH <sub>2</sub> Cl+C <sub>2</sub> H <sub>5</sub> NO <sub>2</sub> → CCl <sub>2</sub> NO <sub>2</sub> +C <sub>2</sub> H <sub>6</sub> +CH <sub>3</sub> | 24.1                     | 25.3     | 23.0   | 21.0     | 23.8     |
| CCl <sub>3</sub> +C <sub>2</sub> H <sub>5</sub> NO <sub>2</sub> → CCl <sub>2</sub> NO <sub>2</sub> +C <sub>2</sub> H <sub>5</sub> Cl                 | 21.2                     | 22.3     | 21.1   | 19.8     | 21.4     |
| CH <sub>2</sub> CCl <sub>2</sub> +C <sub>2</sub> H <sub>5</sub> NO <sub>2</sub> → CCl <sub>2</sub> NO <sub>2</sub> +C <sub>3</sub> H <sub>7</sub>    | 17.6                     | 21.5     | 20.2   | 18.2     | 19.6     |
| CH <sub>3</sub> CCl <sub>2</sub> +C <sub>2</sub> H <sub>5</sub> NO <sub>2</sub> → CCl <sub>2</sub> NO <sub>2</sub> +C <sub>3</sub> H <sub>8</sub>    | 21.7                     | 22.7     | 21.4   | 20.0     | 21.4     |
| CH <sub>2</sub> CCl <sub>3</sub> +C <sub>2</sub> H <sub>5</sub> NO <sub>2</sub> → CCl <sub>2</sub> NO <sub>2</sub> +C <sub>3</sub> H <sub>7</sub> Cl | 20.7                     | 23.2     | 21.3   | 20.7     | 19.7     |
| CCl <sub>2</sub> +CH <sub>3</sub> NO <sub>2</sub> → CCl <sub>2</sub> NO <sub>2</sub> +CH <sub>3</sub>                                                | 19.9                     | 20.9     | 20.4   | 22.4     | 20.6     |
| CHCl <sub>2</sub> +CH <sub>3</sub> NO <sub>2</sub> → CCl <sub>2</sub> NO <sub>2</sub> +CH <sub>4</sub>                                               | 18.1                     | 18.5     | 16.3   | 15.4     | 17.1     |
| 2CHCl+CH <sub>3</sub> NO <sub>2</sub> → CCl <sub>2</sub> NO <sub>2</sub> +CH <sub>4</sub> +CH                                                        | 20.6                     | 20.4     | 22.2   | 22.8     | 20.2     |
| 2CHCl+CH <sub>3</sub> NO <sub>2</sub> → CCl <sub>2</sub> NO <sub>2</sub> +CH <sub>2</sub> +CH <sub>3</sub>                                           | 20.6                     | 20.9     | 21.8   | 21.5     | 21.8     |



**Table S2 (cont).** Enthalpies of formation (kcal mol<sup>-1</sup>) of CCl<sub>2</sub>NO<sub>2</sub> calculated by isodesmic reactions with the different functionals employed. b: 6-311+G(3df).

| Isodesmic reaction                                                                                                                                   | $\Delta H_f(0\text{ K})$ |          |          |           |
|------------------------------------------------------------------------------------------------------------------------------------------------------|--------------------------|----------|----------|-----------|
|                                                                                                                                                      | BMK/b                    | M06-2X/b | MN12-L/b | MN12-SX/b |
| CCl <sub>2</sub> +C <sub>2</sub> H <sub>5</sub> NO <sub>2</sub> → CCl <sub>2</sub> NO <sub>2</sub> +C <sub>2</sub> H <sub>5</sub>                    | 22.6                     | 21.3     | 22.7     | 22.7      |
| CHCl <sub>2</sub> +C <sub>2</sub> H <sub>5</sub> NO <sub>2</sub> → CCl <sub>2</sub> NO <sub>2</sub> +C <sub>2</sub> H <sub>6</sub>                   | 19.7                     | 18.6     | 14.1     | 15.8      |
| 2CH <sub>2</sub> Cl+C <sub>2</sub> H <sub>5</sub> NO <sub>2</sub> → CCl <sub>2</sub> NO <sub>2</sub> +C <sub>2</sub> H <sub>5</sub> +CH <sub>4</sub> | 25.8                     | 26.2     | 19.0     | 22.3      |
| 2CH <sub>2</sub> Cl+C <sub>2</sub> H <sub>5</sub> NO <sub>2</sub> → CCl <sub>2</sub> NO <sub>2</sub> +C <sub>2</sub> H <sub>6</sub> +CH <sub>3</sub> | 26.0                     | 26.2     | 20.3     | 23.0      |
| CCl <sub>3</sub> +C <sub>2</sub> H <sub>5</sub> NO <sub>2</sub> → CCl <sub>2</sub> NO <sub>2</sub> +C <sub>2</sub> H <sub>5</sub> Cl                 | 22.7                     | 22.5     | 19.6     | 21.0      |
| CH <sub>2</sub> CCl <sub>2</sub> +C <sub>2</sub> H <sub>5</sub> NO <sub>2</sub> → CCl <sub>2</sub> NO <sub>2</sub> +C <sub>3</sub> H <sub>7</sub>    | 22.0                     | 22.6     | 20.2     | 20.5      |
| CH <sub>3</sub> CCl <sub>2</sub> +C <sub>2</sub> H <sub>5</sub> NO <sub>2</sub> → CCl <sub>2</sub> NO <sub>2</sub> +C <sub>3</sub> H <sub>8</sub>    | 24.2                     | 23.3     | 20.1     | 20.9      |
| CH <sub>2</sub> CCl <sub>3</sub> +C <sub>2</sub> H <sub>5</sub> NO <sub>2</sub> → CCl <sub>2</sub> NO <sub>2</sub> +C <sub>3</sub> H <sub>7</sub> Cl | 23.6                     | 23.5     | 19.4     | 21.3      |
| CCl <sub>2</sub> +CH <sub>3</sub> NO <sub>2</sub> → CCl <sub>2</sub> NO <sub>2</sub> +CH <sub>3</sub>                                                | 23.5                     | 21.3     | 23.7     | 23.8      |
| CHCl <sub>2</sub> +CH <sub>3</sub> NO <sub>2</sub> → CCl <sub>2</sub> NO <sub>2</sub> +CH <sub>4</sub>                                               | 20.5                     | 18.7     | 13.9     | 16.2      |
| 2CHCl+CH <sub>3</sub> NO <sub>2</sub> → CCl <sub>2</sub> NO <sub>2</sub> +CH <sub>4</sub> +CH                                                        | 22.0                     | 21.0     | 24.7     | 23.6      |
| 2CHCl+CH <sub>3</sub> NO <sub>2</sub> → CCl <sub>2</sub> NO <sub>2</sub> +CH <sub>2</sub> +CH <sub>3</sub>                                           | 23.5                     | 21.3     | 22.1     | 22.9      |

**Table S2 (cont).** Enthalpies of formation (kcal mol<sup>-1</sup>) of CCl<sub>2</sub>NO<sub>2</sub> calculated by isodesmic reactions with the different functionals employed. b: 6-311+G(3df).

| Isodesmic reaction                                                                                                                                   | $\Delta H_f(0\text{ K})$ |             |           |                 |
|------------------------------------------------------------------------------------------------------------------------------------------------------|--------------------------|-------------|-----------|-----------------|
|                                                                                                                                                      | M11-L/b                  | CAM-B3LYP/b | SOGGA11/b | $\omega$ B97X-D |
| CCl <sub>2</sub> +C <sub>2</sub> H <sub>5</sub> NO <sub>2</sub> → CCl <sub>2</sub> NO <sub>2</sub> +C <sub>2</sub> H <sub>5</sub>                    | 21.4                     | 16.6        | 19.9      | 19.3            |
| CHCl <sub>2</sub> +C <sub>2</sub> H <sub>5</sub> NO <sub>2</sub> → CCl <sub>2</sub> NO <sub>2</sub> +C <sub>2</sub> H <sub>6</sub>                   | 13.0                     | 17.8        | 17.5      | 17.9            |
| 2CH <sub>2</sub> Cl+C <sub>2</sub> H <sub>5</sub> NO <sub>2</sub> → CCl <sub>2</sub> NO <sub>2</sub> +C <sub>2</sub> H <sub>5</sub> +CH <sub>4</sub> | 16.3                     | 25.2        | 23.3      | 25.1            |
| 2CH <sub>2</sub> Cl+C <sub>2</sub> H <sub>5</sub> NO <sub>2</sub> → CCl <sub>2</sub> NO <sub>2</sub> +C <sub>2</sub> H <sub>6</sub> +CH <sub>3</sub> | 17.8                     | 25.6        | 25.3      | 25.4            |
| CCl <sub>3</sub> +C <sub>2</sub> H <sub>5</sub> NO <sub>2</sub> → CCl <sub>2</sub> NO <sub>2</sub> +C <sub>2</sub> H <sub>5</sub> Cl                 | 19.6                     | 22.4        | 21.0      | 22.4            |
| CH <sub>2</sub> CCl <sub>2</sub> +C <sub>2</sub> H <sub>5</sub> NO <sub>2</sub> → CCl <sub>2</sub> NO <sub>2</sub> +C <sub>3</sub> H <sub>7</sub>    | 15.4                     | 17.8        | 18.6      | 19.1            |
| CH <sub>3</sub> CCl <sub>2</sub> +C <sub>2</sub> H <sub>5</sub> NO <sub>2</sub> → CCl <sub>2</sub> NO <sub>2</sub> +C <sub>3</sub> H <sub>8</sub>    | 18.3                     | 23.1        | 22.5      | 22.6            |
| CH <sub>2</sub> CCl <sub>3</sub> +C <sub>2</sub> H <sub>5</sub> NO <sub>2</sub> → CCl <sub>2</sub> NO <sub>2</sub> +C <sub>3</sub> H <sub>7</sub> Cl | 17.2                     | 21.5        | 20.1      | 21.0            |
| CCl <sub>2</sub> +CH <sub>3</sub> NO <sub>2</sub> → CCl <sub>2</sub> NO <sub>2</sub> +CH <sub>3</sub>                                                | 23.7                     | 17.8        | 22.7      | 20.9            |
| CHCl <sub>2</sub> +CH <sub>3</sub> NO <sub>2</sub> → CCl <sub>2</sub> NO <sub>2</sub> +CH <sub>4</sub>                                               | 13.6                     | 18.6        | 18.3      | 19.1            |
| 2CHCl+CH <sub>3</sub> NO <sub>2</sub> → CCl <sub>2</sub> NO <sub>2</sub> +CH <sub>4</sub> +CH                                                        | 22.2                     | 18.5        | 22.1      | 20.8            |
| 2CHCl+CH <sub>3</sub> NO <sub>2</sub> → CCl <sub>2</sub> NO <sub>2</sub> +CH <sub>2</sub> +CH <sub>3</sub>                                           | 21.7                     | 18.8        | 23.9      | 21.4            |

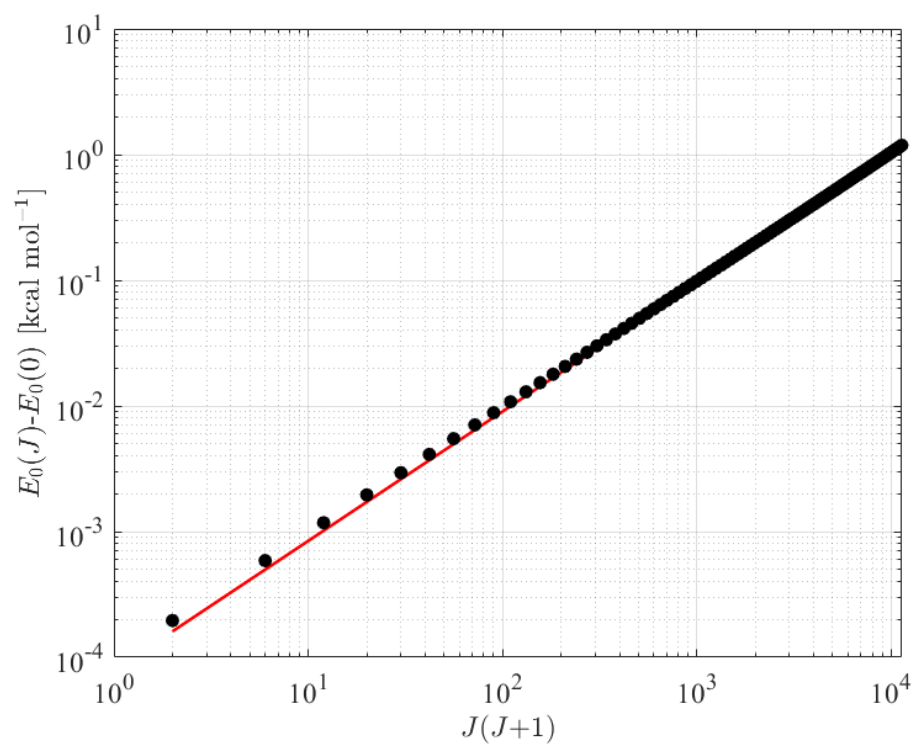

**Figure S1.** Centrifugal barrier as a function of  $J(J+1)$  at the M11-L/6-311+G(3df) level. Fit performed with the expression  $C_v J(J+1)^\nu$ .

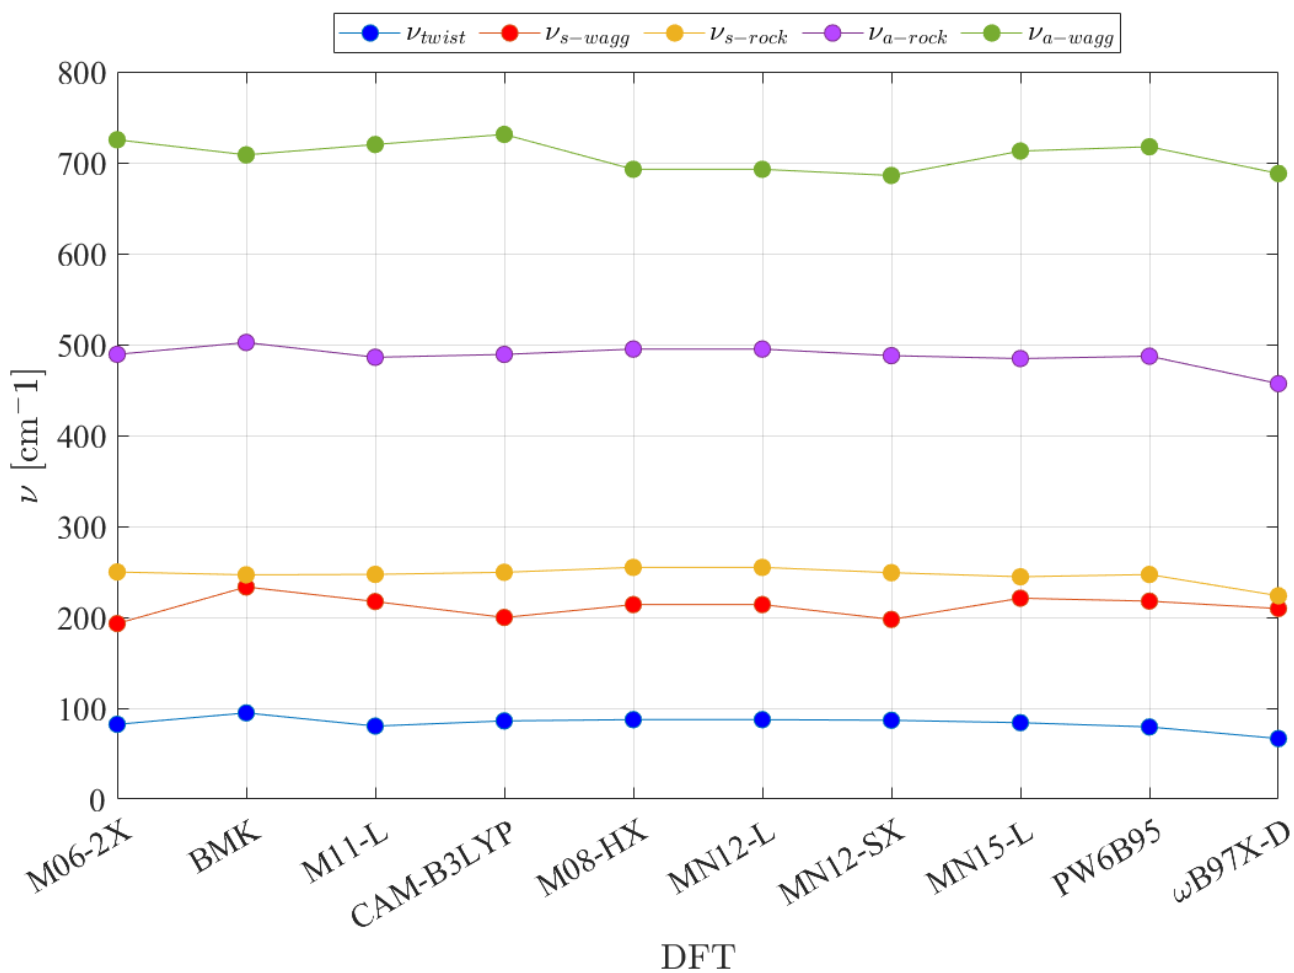

**Figure S2.** Frequencies of the transitional modes calculated with different DFT models coupled with the 6-311+G(3df) basis set.

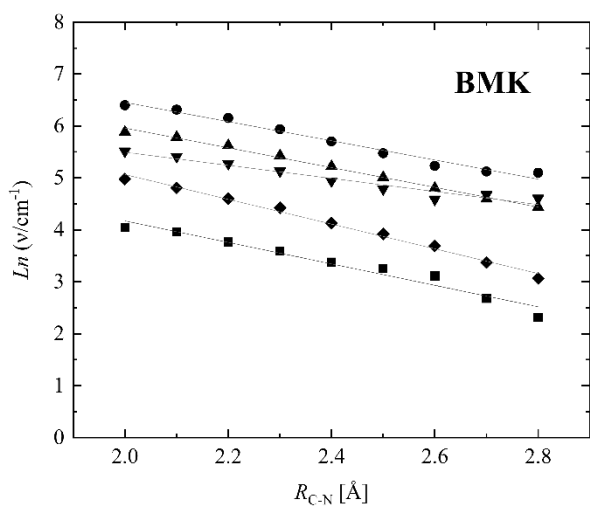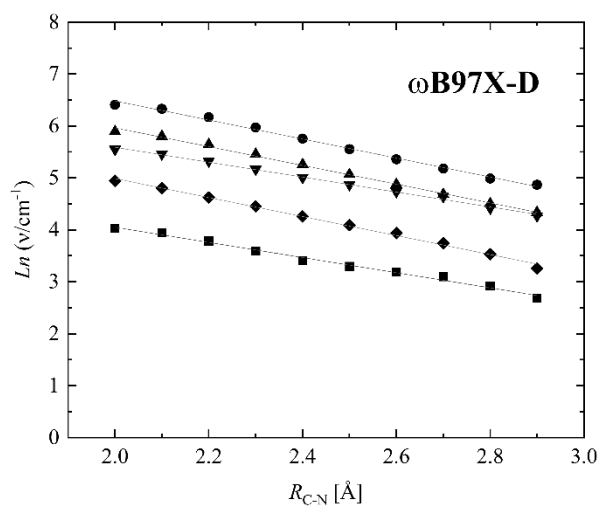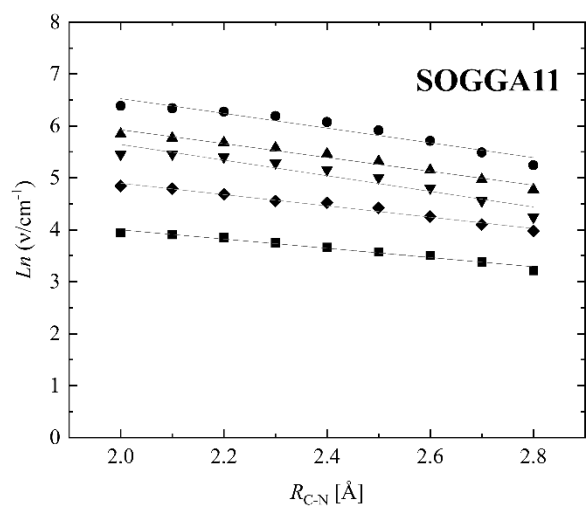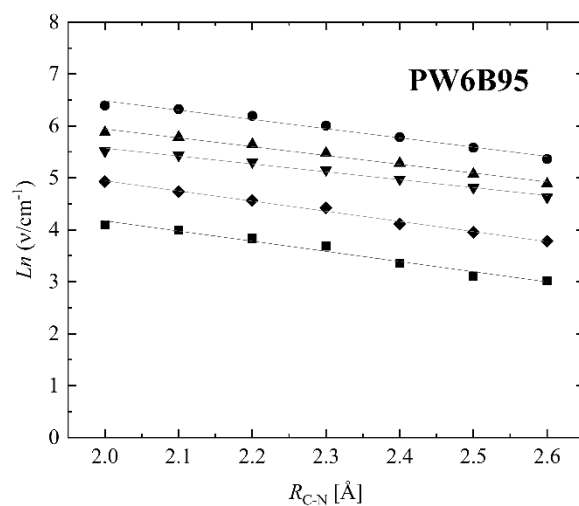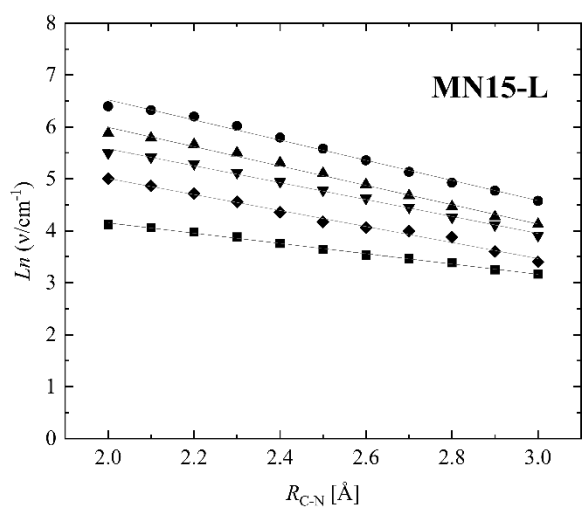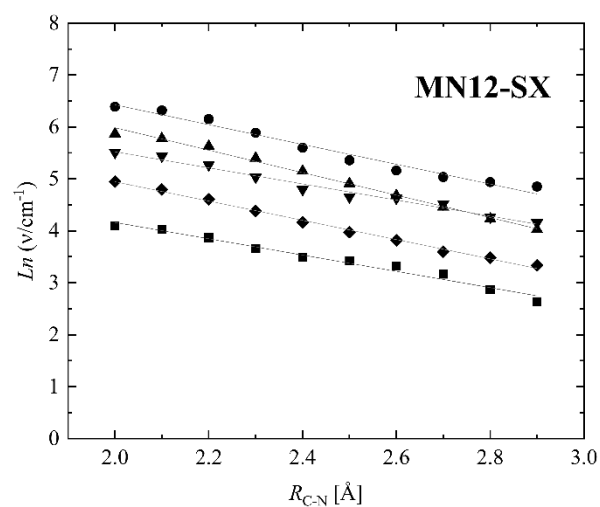

**Figure S3.** Vibrational frequencies corresponding to the transitional modes as a function of the N-C bond length at the DFT/6-311+G(3df) level of theory. ■: Torsion. ◆: Symmetric Rocking. ▼: Symmetric wagging. ▲: Asymmetric Rocking. ●: Asymmetric wagging.

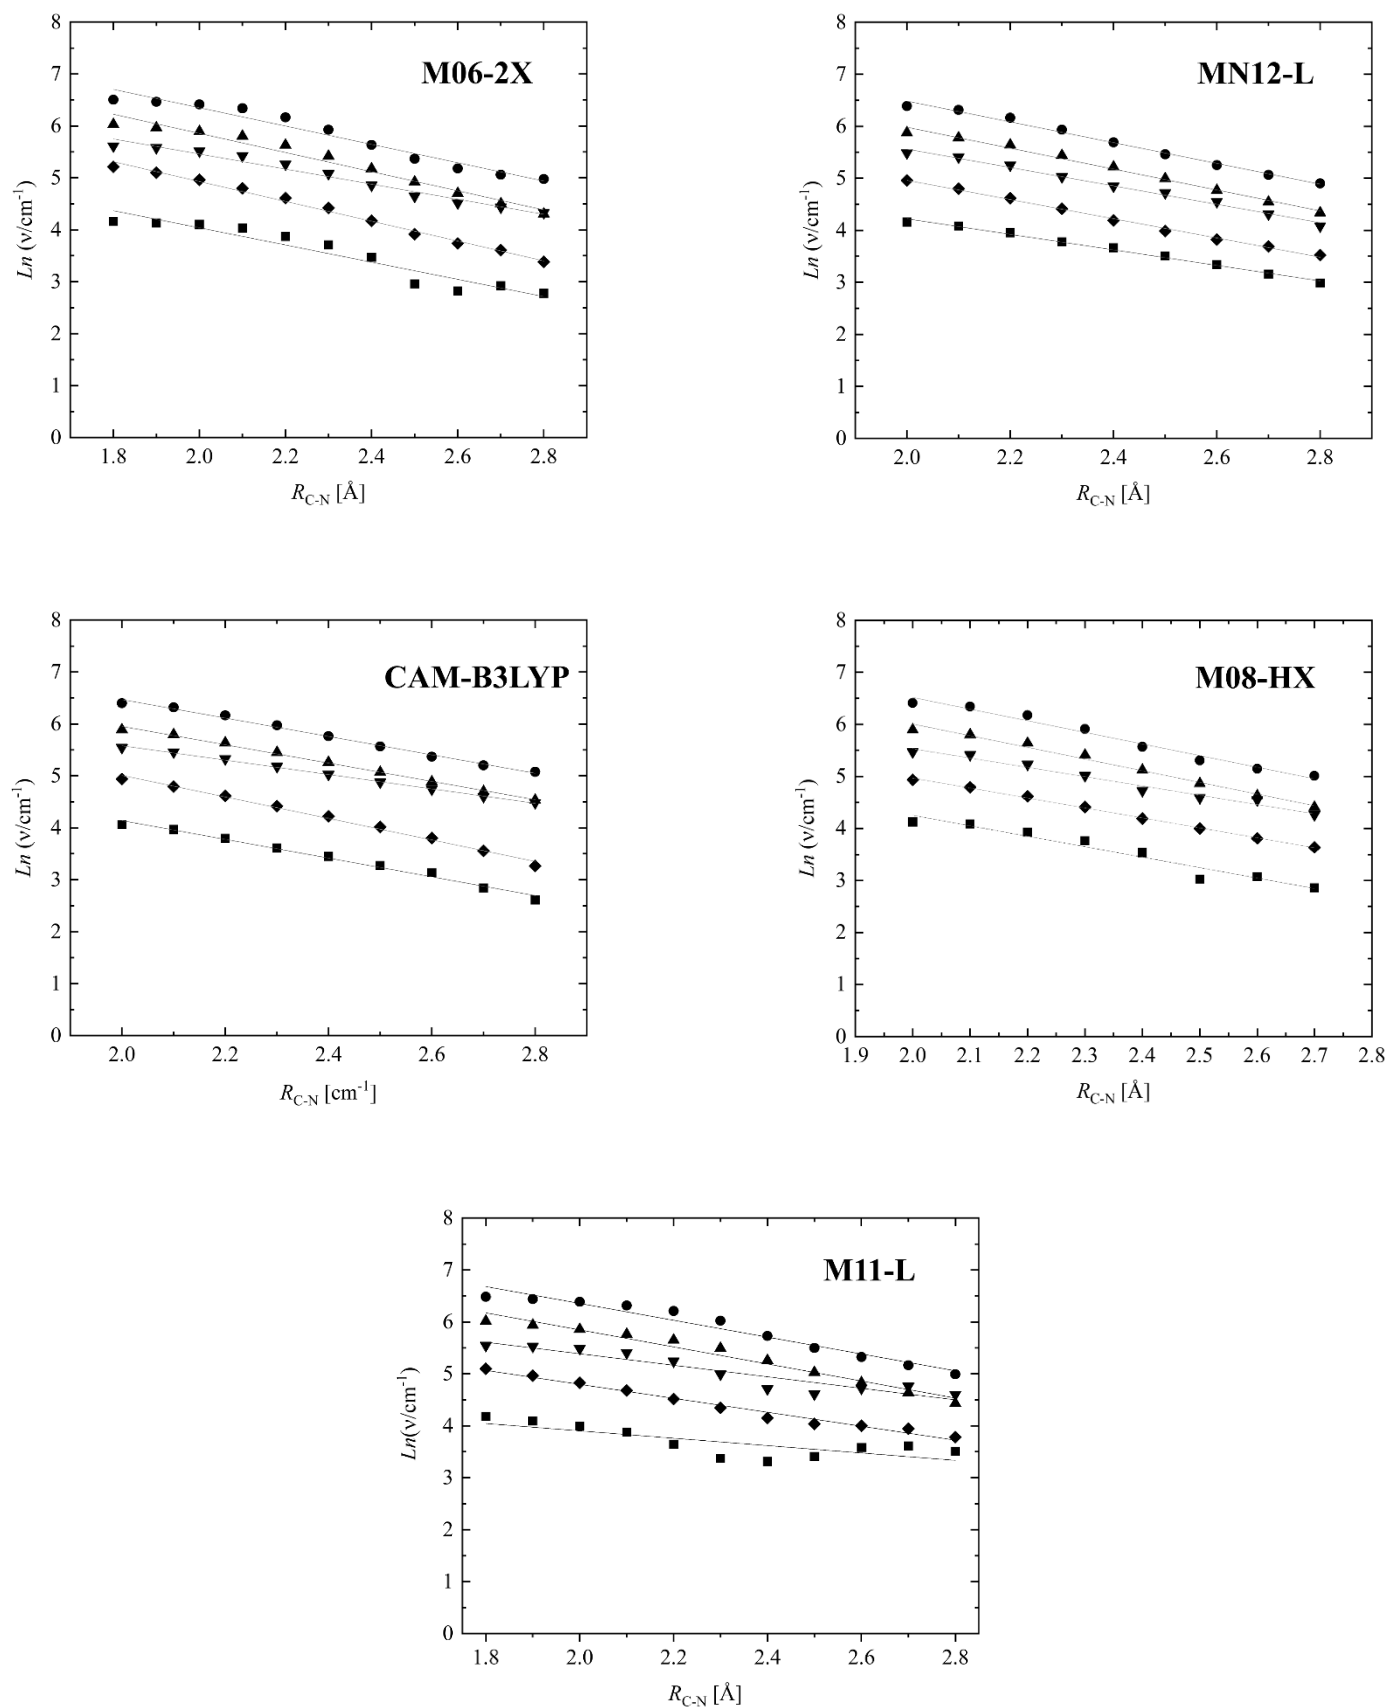

**Figure S3 (cont.).** Vibrational frequencies corresponding to the transitional modes as a function of the N-C bond length at the DFT/6-311+G(3*df*) level of theory. ■: Torsion. ◆: Symmetric Rocking. ▼: Symmetric wagging. ▲: Asymmetric Rocking. ●: Asymmetric wagging.

**Table S3.** Looseness parameter,  $\alpha$  (in  $\text{\AA}^{-1}$ ), of the transitional modes as determined by DFT/6-311+G(3df) level of theory. Morse parameter,  $\beta$  (in  $\text{\AA}^{-1}$ ), determined by G4//DFT/6-311+G(3df) level of theory.

| DFT                                 | $\alpha_{\text{twist}}$           | $\alpha_{\text{s-rock}}$          | $\alpha_{\text{s-wagg}}$          | $\alpha_{\text{a-rock}}$          | $\alpha_{\text{a-wagg}}$          | $\beta$                           |
|-------------------------------------|-----------------------------------|-----------------------------------|-----------------------------------|-----------------------------------|-----------------------------------|-----------------------------------|
| M06-2X                              | 1.65                              | 1.91                              | 1.45                              | 1.84                              | 1.76                              | 4.46                              |
| BMK                                 | 2.07                              | 2.38                              | 1.26                              | 1.90                              | 1.85                              | 4.44                              |
| M11-L                               | 0.71                              | 1.34                              | 1.11                              | 1.64                              | 1.62                              | 4.42                              |
| CAM-B3LYP                           | 1.80                              | 2.07                              | 1.38                              | 1.76                              | 1.77                              | 4.24                              |
| M08-HX                              | 2.01                              | 1.91                              | 1.79                              | 2.24                              | 2.15                              | 4.40                              |
| MN12-L                              | 1.49                              | 1.85                              | 1.77                              | 2.01                              | 2.00                              | 4.36                              |
| MN12-SX                             | 1.57                              | 1.85                              | 1.55                              | 2.16                              | 1.91                              | 4.43                              |
| MN15-L                              | 1.00                              | 1.54                              | 1.63                              | 1.86                              | 1.94                              | 4.69                              |
| PW6B95                              | 1.96                              | 1.95                              | 1.52                              | 1.70                              | 1.78                              | 4.30                              |
| $\omega$ B97X-D                     | 1.45                              | 1.83                              | 1.44                              | 1.81                              | 1.83                              | 4.36                              |
| SOGGA11                             | 0.89                              | 1.09                              | 1.50                              | 1.33                              | 1.42                              | 4.53                              |
| <b>Mean <math>\pm \sigma</math></b> | <b>1.51 <math>\pm</math> 0.47</b> | <b>1.79 <math>\pm</math> 0.35</b> | <b>1.49 <math>\pm</math> 0.20</b> | <b>1.84 <math>\pm</math> 0.24</b> | <b>1.82 <math>\pm</math> 0.19</b> | <b>4.42 <math>\pm</math> 0.12</b> |

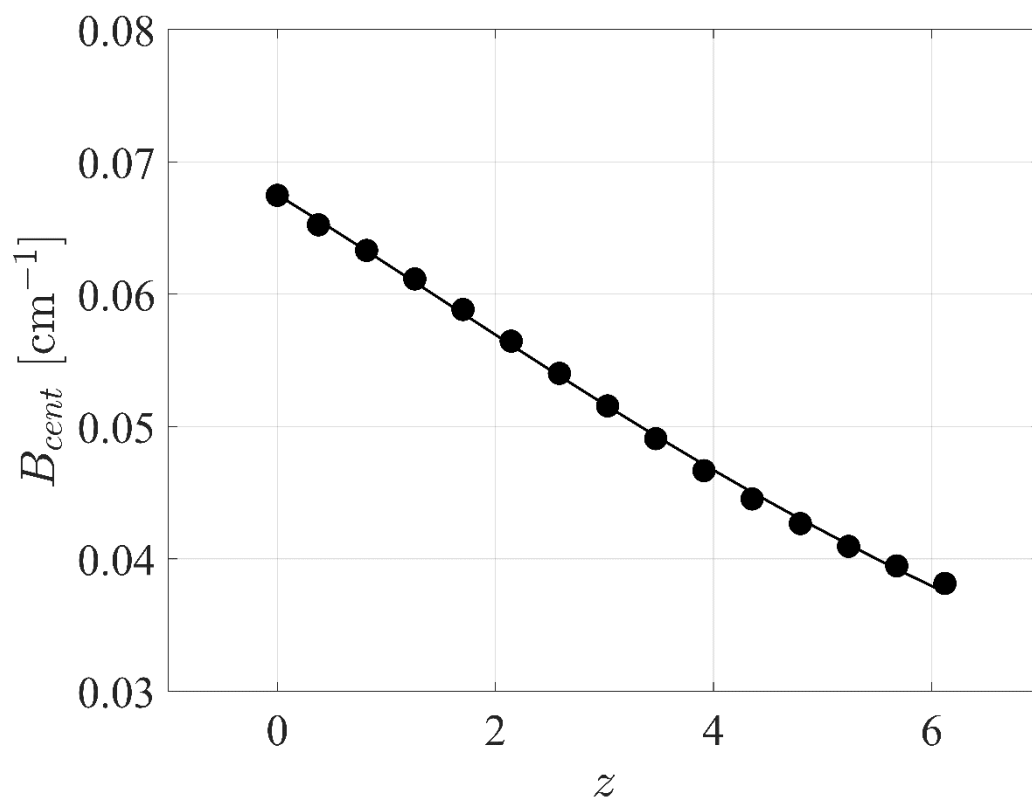

**Figure S4.** Centrifugal rotational constant as a function of the C-N bond length at the M11-L/6-311+G(3df) level. Continuous line: Fit performed with equation  $B_{cent}(r) = B_e/[1 + a_1z + a_2z^2]$  with  $z = \beta(r-r_e)$ . See text.



**Table S4.**  $Be$ ,  $a_1$  and  $a_2$  parameters determined for the different functionals employed.

| DFT                                 | $Be$ [ $\text{cm}^{-1}$ ]           | $a_1$                                            | $a_2$                                            |
|-------------------------------------|-------------------------------------|--------------------------------------------------|--------------------------------------------------|
| M11-L                               | 0.068                               | $7.4 \times 10^{-2}$                             | $9.2 \times 10^{-3}$                             |
| M06-2X                              | 0.066                               | $7.2 \times 10^{-2}$                             | $7.8 \times 10^{-3}$                             |
| BMK                                 | 0.064                               | $5.0 \times 10^{-2}$                             | $1.4 \times 10^{-2}$                             |
| CAM-B3LYP                           | 0.065                               | $4.9 \times 10^{-2}$                             | $1.7 \times 10^{-2}$                             |
| M08-HX                              | 0.066                               | $7.1 \times 10^{-2}$                             | $8.0 \times 10^{-3}$                             |
| MN12-L                              | 0.066                               | $8.4 \times 10^{-2}$                             | $4.8 \times 10^{-3}$                             |
| MN12-SX                             | 0.064                               | $4.2 \times 10^{-2}$                             | $1.2 \times 10^{-2}$                             |
| MN15-L                              | 0.065                               | $7.9 \times 10^{-2}$                             | $3.8 \times 10^{-3}$                             |
| PW6B95                              | 0.065                               | $4.7 \times 10^{-2}$                             | $1.7 \times 10^{-2}$                             |
| $\omega$ B97X-D                     | 0.065                               | $5.9 \times 10^{-2}$                             | $1.3 \times 10^{-2}$                             |
| SOGGA11                             | 0.064                               | $6.9 \times 10^{-2}$                             | $1.0 \times 10^{-2}$                             |
| <b>Mean <math>\pm \sigma</math></b> | <b><math>0.065 \pm 0.001</math></b> | <b><math>(6.3 \pm 1.5) \times 10^{-2}</math></b> | <b><math>(1.1 \pm 0.5) \times 10^{-2}</math></b> |

**Table S5.** High pressure limit rate constants (in  $\text{cm}^3 \text{ molecule}^{-1} \text{ s}^{-1}$ ) as a function of the temperature (in K), calculated for the  $\text{CCl}_2 + \text{NO}_2 \rightarrow \text{CCl}_2\text{NO}_2$  reaction (channel 1) with SSACM formalism.  $F_{\text{AM}}^* = 6.48$ ,  $\sigma^* = 4.0$  and  $D_e = 46.3 \text{ kcal mol}^{-1}$  (calculated as  $\Delta H_r(0 \text{ K}) - (\text{ZPE}(\text{CCl}_2) + \text{ZPE}(\text{NO}_2)) - \text{ZPE}(\text{CCl}_2\text{NO}_2)$ ).  $Q_{\text{NO}_2}$  and  $Q_{\text{CCl}_2}$ : Ro-vibrational partition functions.

| $T$  | $Q_{\text{NO}_2}$  | $Q_{\text{CCl}_2}$ | $Q_v$  | $Q_m$              | $Q_{\text{cent}}$  | $f_{\text{rigid}}$   | $k_{1,\infty}$         |
|------|--------------------|--------------------|--------|--------------------|--------------------|----------------------|------------------------|
| 300  | $2.06 \times 10^3$ | $2.08 \times 10^4$ | 1.49   | $7.39 \times 10^4$ | $5.93 \times 10^3$ | $3.7 \times 10^{-3}$ | $8.73 \times 10^{-13}$ |
| 500  | $4.90 \times 10^3$ | $6.77 \times 10^4$ | 2.70   | $3.66 \times 10^5$ | $9.58 \times 10^3$ | $4.5 \times 10^{-3}$ | $1.33 \times 10^{-12}$ |
| 1000 | $2.17 \times 10^4$ | $5.34 \times 10^5$ | 12.78  | $2.52 \times 10^6$ | $1.82 \times 10^4$ | $4.4 \times 10^{-3}$ | $1.74 \times 10^{-12}$ |
| 1500 | $6.58 \times 10^4$ | $2.22 \times 10^6$ | 49.61  | $6.19 \times 10^6$ | $2.65 \times 10^4$ | $3.3 \times 10^{-3}$ | $1.57 \times 10^{-12}$ |
| 2000 | $1.62 \times 10^5$ | $6.56 \times 10^6$ | 155.40 | $9.85 \times 10^6$ | $3.45 \times 10^4$ | $2.3 \times 10^{-3}$ | $1.22 \times 10^{-12}$ |

**Table S6.** High pressure limit rate constants (in  $\text{cm}^3 \text{ molecule}^{-1} \text{ s}^{-1}$ ) as a function of the temperature (in K), calculated for the  $\text{CCl}_2 + \text{NO}_2 \rightarrow \text{CCl}_2\text{NO}_2$  reaction (channel 1) according the SACM/CT formalism.  $D_e = 46.3 \text{ kcal mol}^{-1}$  (calculated as  $\Delta H_r(0 \text{ K}) - (\text{ZPE}(\text{CCl}_2) + \text{ZPE}(\text{NO}_2)) - \text{ZPE}(\text{CCl}_2\text{NO}_2)$ ).

| $T$  | $f_{\text{rigid}}$   | $k_{1,\infty}$         |
|------|----------------------|------------------------|
| 300  | $2.9 \times 10^{-3}$ | $7.63 \times 10^{-13}$ |
| 500  | $3.6 \times 10^{-3}$ | $1.16 \times 10^{-12}$ |
| 1000 | $4.9 \times 10^{-3}$ | $2.04 \times 10^{-12}$ |
| 1500 | $5.8 \times 10^{-3}$ | $2.82 \times 10^{-12}$ |
| 2000 | $6.5 \times 10^{-3}$ | $3.55 \times 10^{-12}$ |

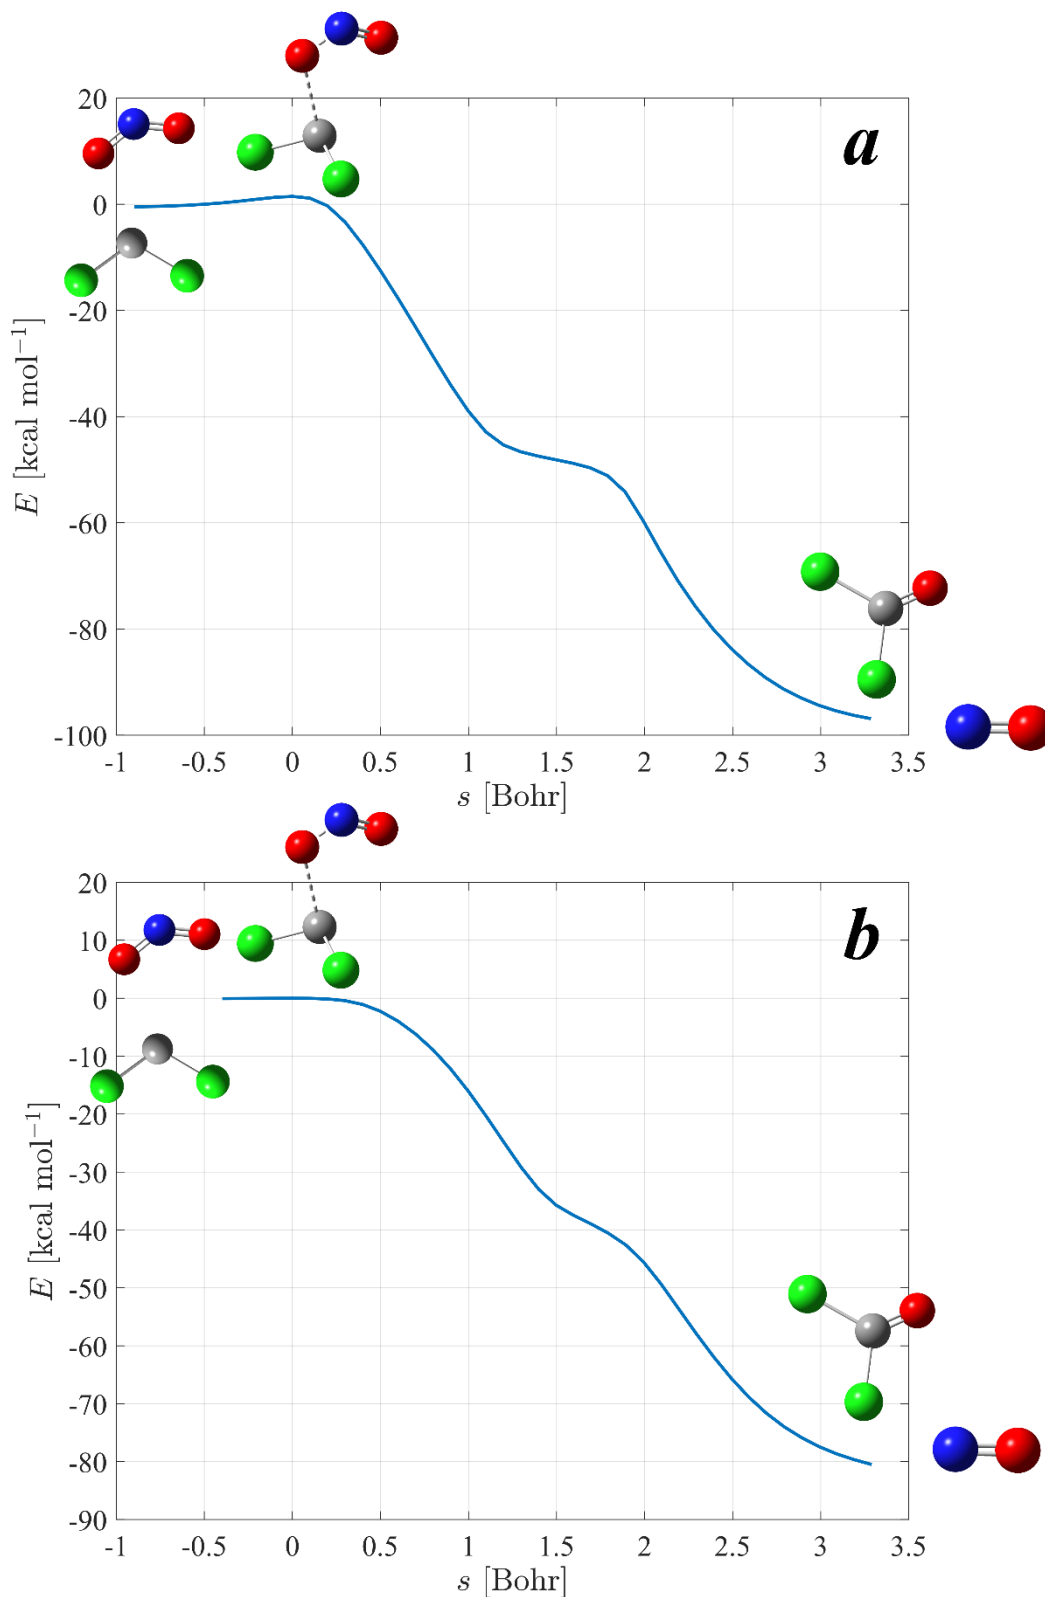

**Figure S5.** Intrinsic Reaction Coordinate calculation of reaction  $\text{CCl}_2 + \text{NO}_2 \rightarrow \text{CCl}_2\text{O} + \text{NO}$  following transition state TS2a. a) M06-2X/6-311+G(3df) level of theory. b) M11-L/6-311+G(3df) level of theory.

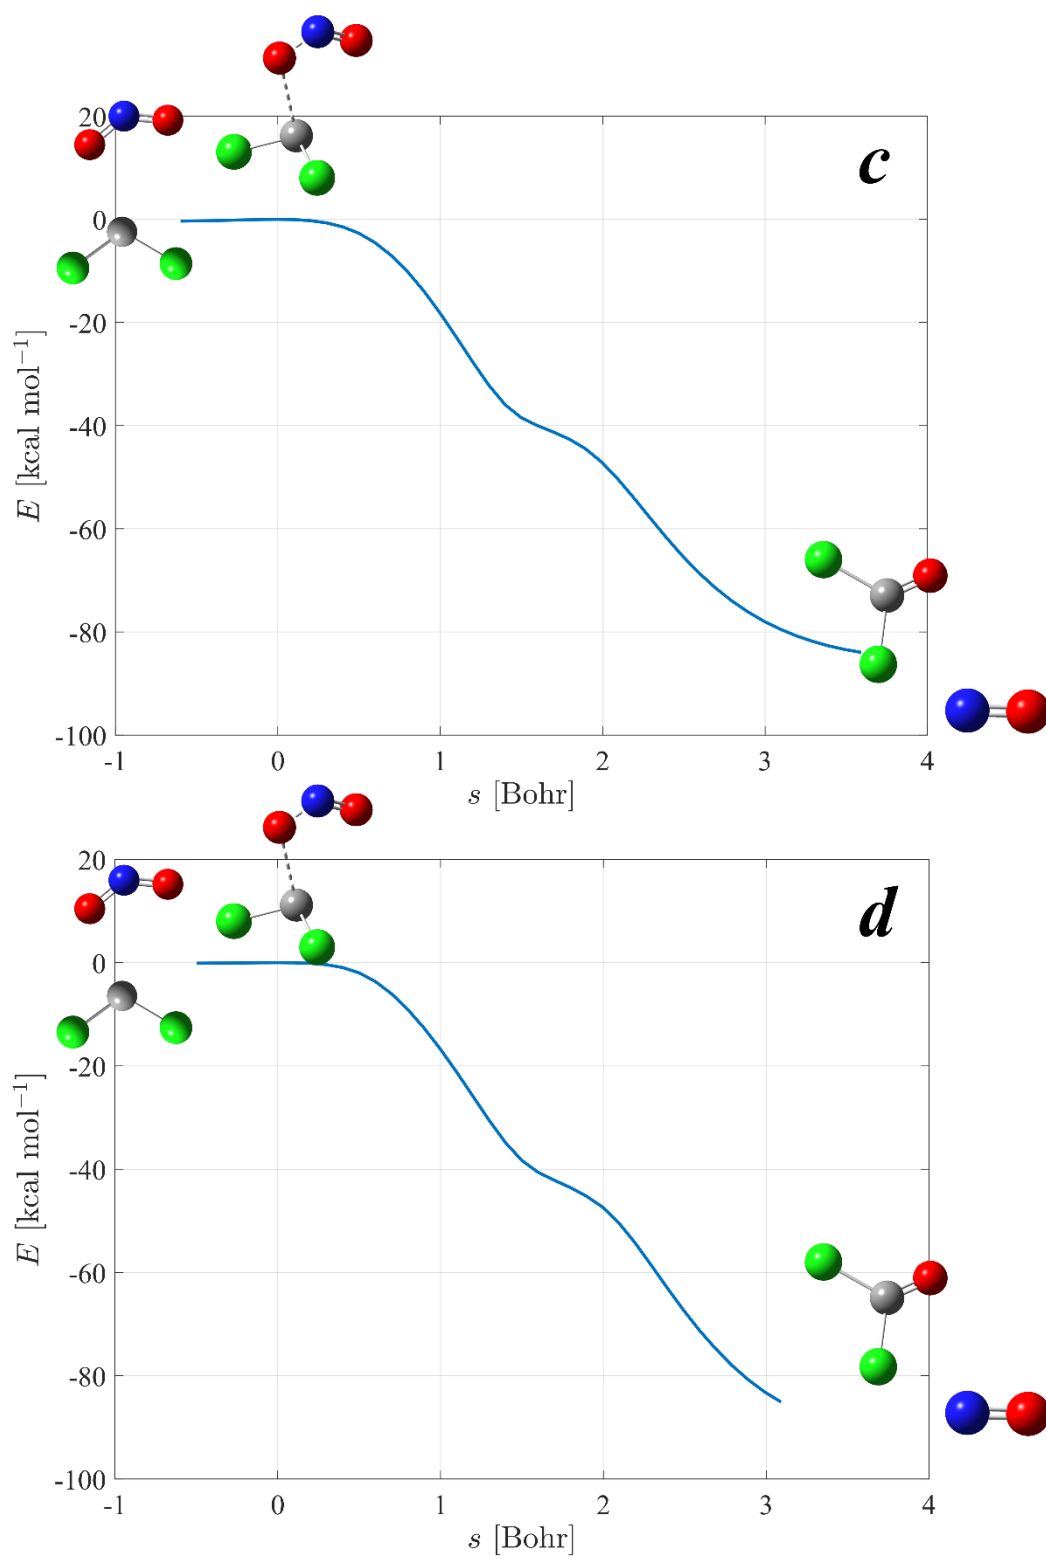

**Figure S5 (cont.).** Intrinsic Reaction Coordinate calculation of reaction  $\text{CCl}_2 + \text{NO}_2 \rightarrow \text{CCl}_2\text{O} + \text{NO}$  following transition state TS2a. c) MN15-L/6-311+G(3df) level of theory. d) PW6B95/6-311+G(3df) level of theory.

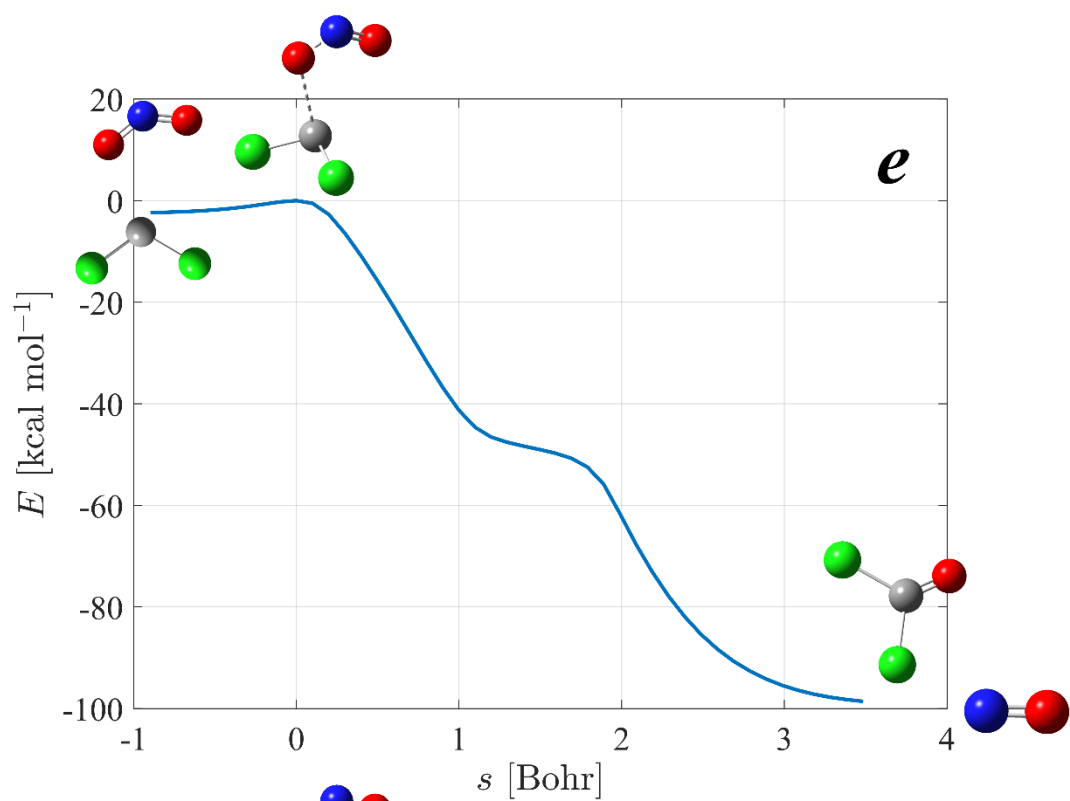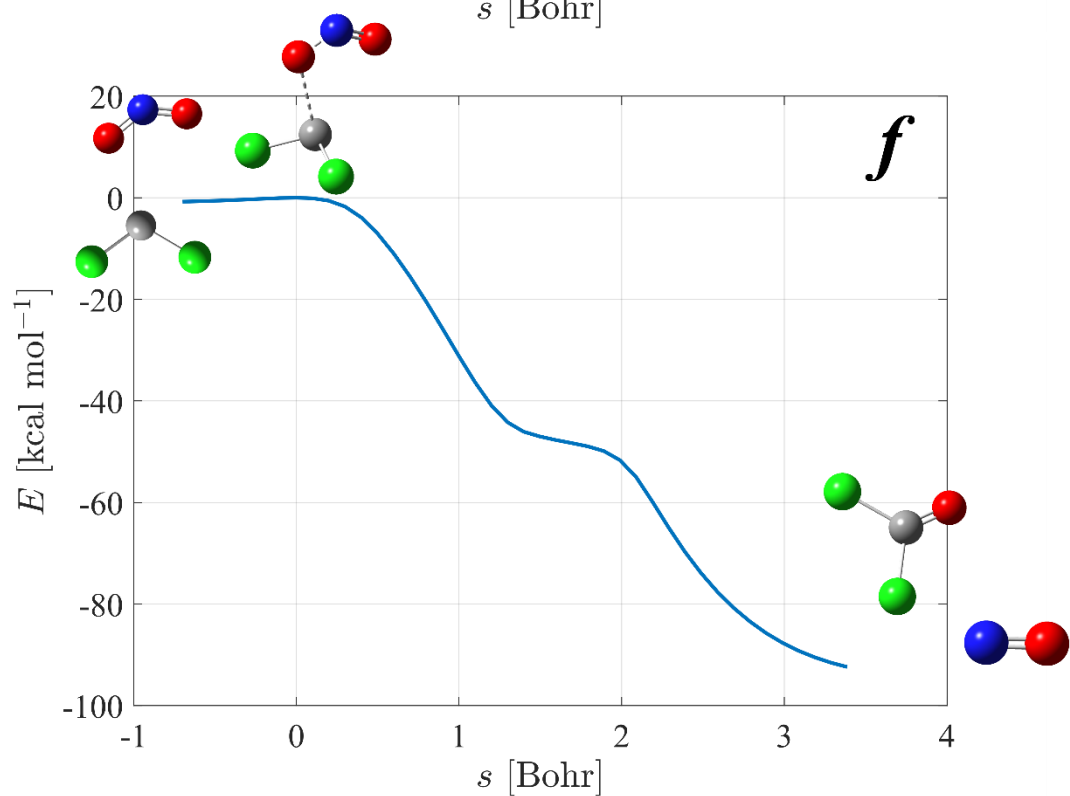

**Figure S5 (cont.).** Intrinsic Reaction Coordinate calculation of reaction  $\text{CCl}_2 + \text{NO}_2 \rightarrow \text{CCl}_2\text{O} + \text{NO}$  following transition state TS2a. e) M08-HX/6-311+G(3df) level of theory. f) MN15/6-311+G(3df) level of theory.

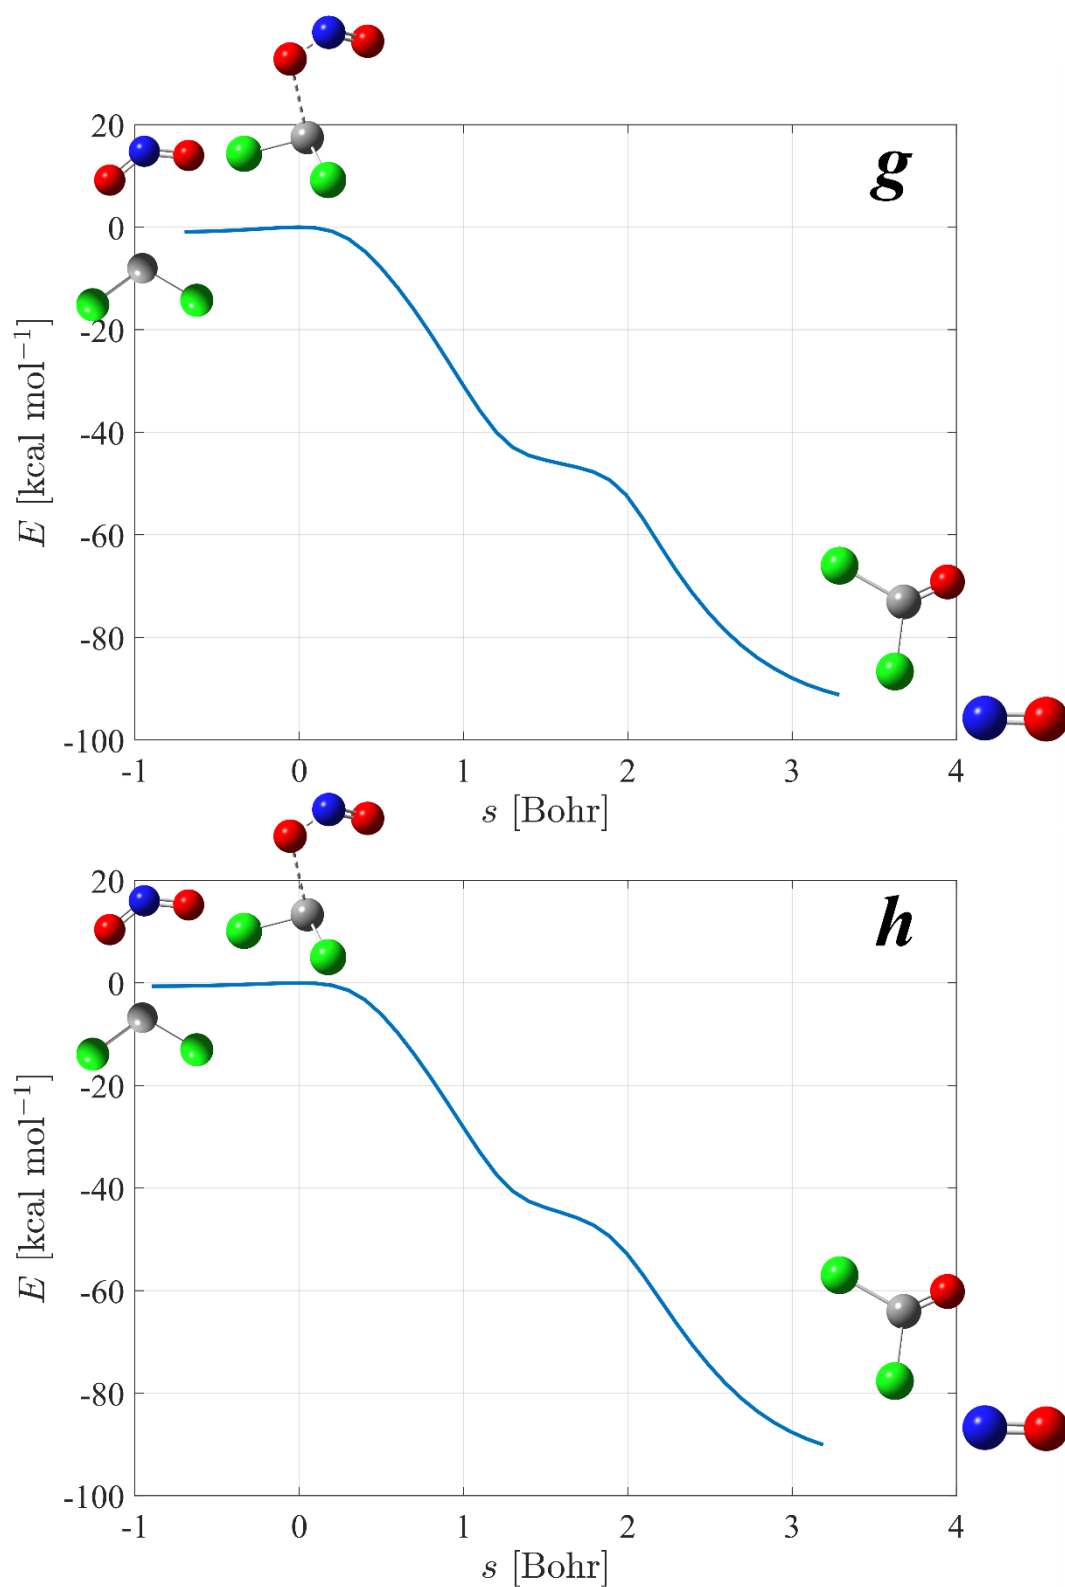

**Figure S5 (cont.).** Intrinsic Reaction Coordinate calculation of reaction  $\text{CCl}_2 + \text{NO}_2 \rightarrow \text{CCl}_2\text{O} + \text{NO}$  following transition state TS2a. g) MN12-SX/6-311+G(3df) level of theory. h)  $\omega\text{B97X-D}/6\text{-}311\text{+G}(3\text{df})$  level of theory.

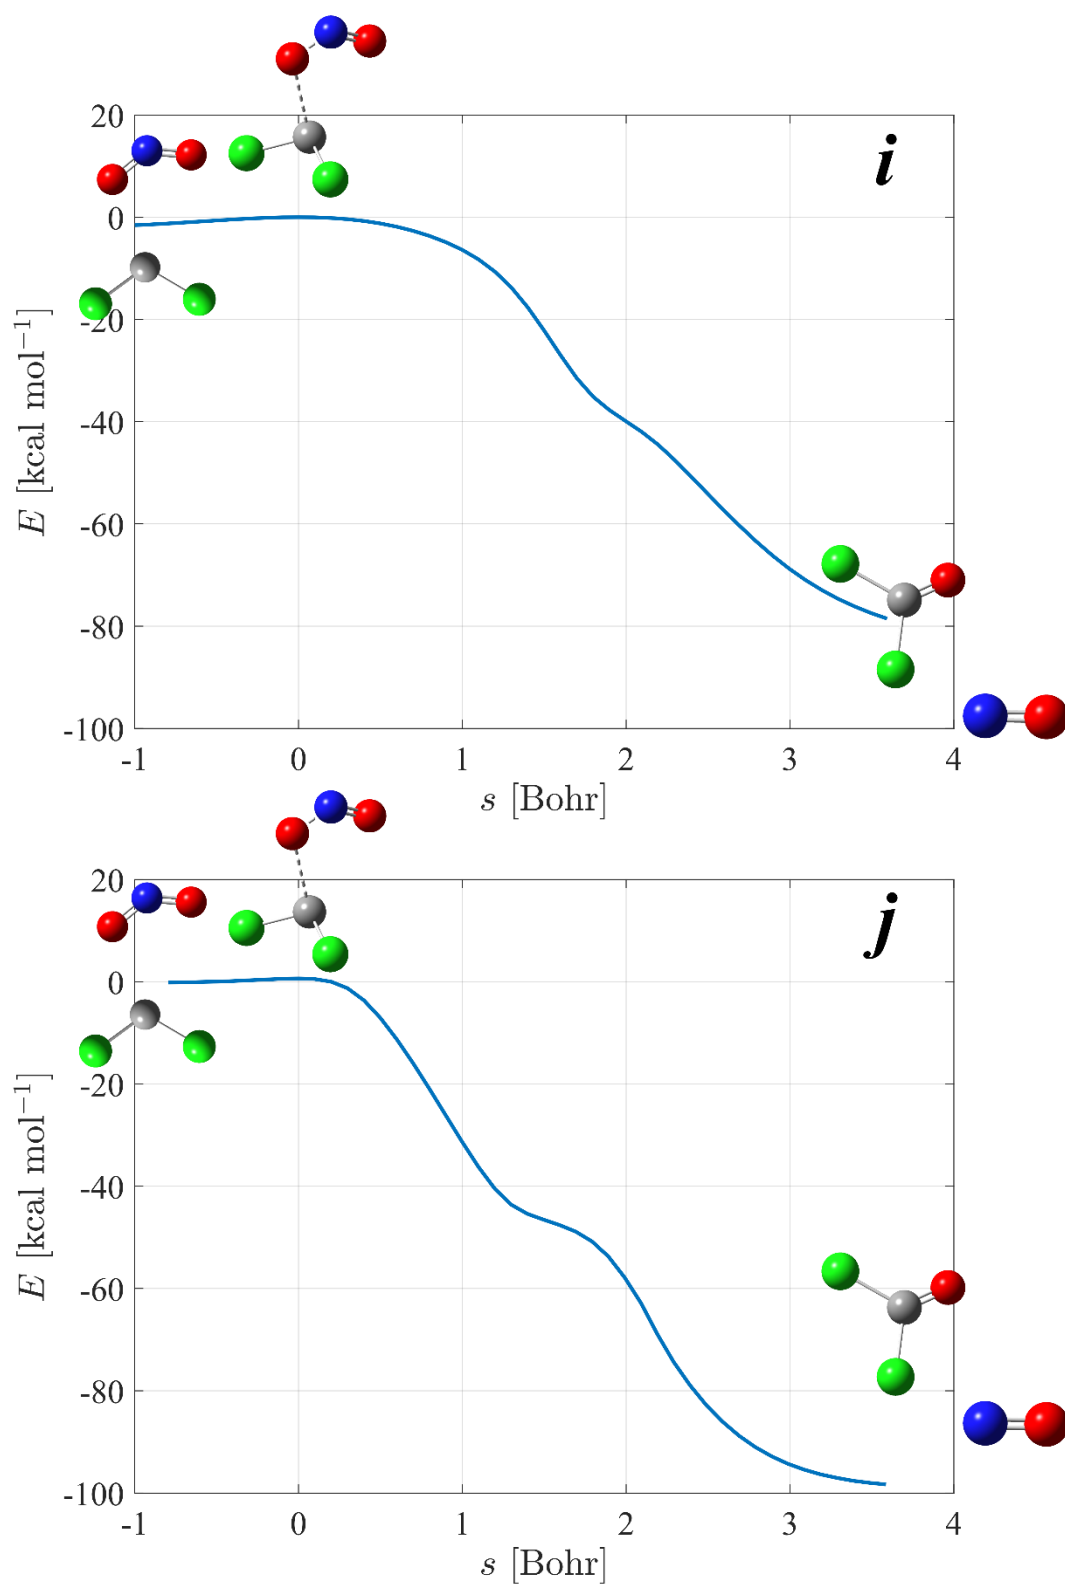

**Figure S5 (cont.).** Intrinsic Reaction Coordinate calculation of reaction  $\text{CCl}_2 + \text{NO}_2 \rightarrow \text{CCl}_2\text{O} + \text{NO}$  following transition state TS2a. *i*) SOGGA11/6-311+G(3df) level of theory. *j*) BMK/6-311+G(3df) level of theory.

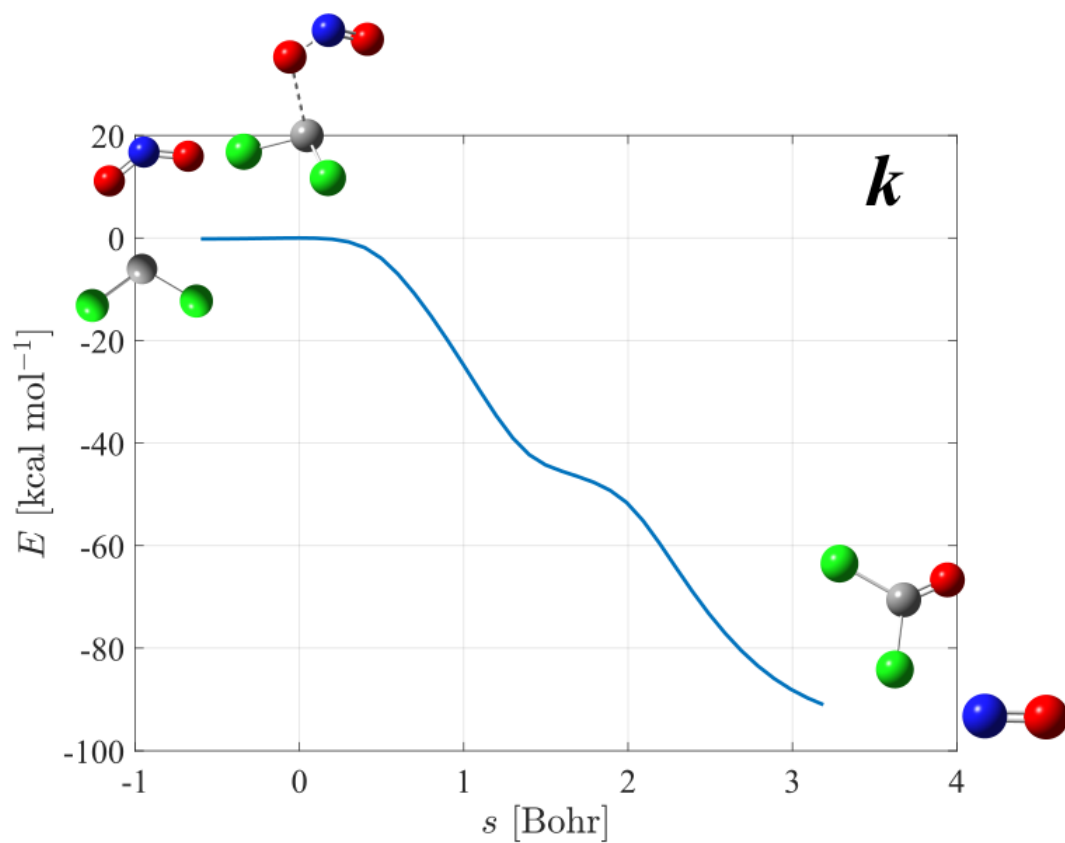

**Figure S5 (cont.).** Intrinsic Reaction Coordinate calculation of reaction  $\text{CCl}_2 + \text{NO}_2 \rightarrow \text{CCl}_2\text{O} + \text{NO}$  following transition state TS2a. k) CAM-B3LYP/6-311+G(3df) level of theory.



**Table S7.** Barrier height (TS2a) of the  $\text{CCl}_2 + \text{NO}_2 \rightarrow \text{CCl}_2\text{O} + \text{NO}$  reaction (channel 2) (in  $\text{kcal mol}^{-1}$ ). b: 6-311+G(3df).

| <b>Chemistry Models</b> | $\Delta H_0^\ddagger$ | <b>Chemistry Models</b>      | $\Delta H_0^\ddagger$ |
|-------------------------|-----------------------|------------------------------|-----------------------|
| M06-2X/b                | -0.21                 | G4(MP2)//MN12-L /b           | -0.06                 |
| MN15/b                  | -1.12                 | G4(MP2)//MN12-SX /b          | 3.03                  |
| M11-L/b                 | -1.79                 | G4(MP2)//MN15-L /b           | 1.83                  |
| M08-HX/b                | -0.08                 | G4(MP2)// $\omega$ B97X-D /b | 3.18                  |
| PW6B95/b                | -0.61                 | G4(MP2)//SOGGA11/b           | 1.07                  |
| BMK/b                   | 0.91                  | G4(MP2)//CAM-B3LYP/b         | 2.67                  |
| MN12-L/b                | -2.74                 | G4//M06-2X/b                 | 2.87                  |
| MN12-SX/b               | -1.34                 | G4//MN15/b                   | 2.73                  |
| MN15-L/b                | -2.78                 | G4//M11-L/b                  | 1.12                  |
| $\omega$ B97X-D/b       | -0.25                 | G4//M08-HX/b                 | 2.78                  |
| SOGGA11/b               | 1.15                  | G4//PW6B95/b                 | 0.91                  |
| CAM-B3LYP/b             | -0.34                 | G4//BMK/b                    | 3.14                  |
| G4(MP2)//M06-2X/b       | 3.10                  | G4//MN12-L/b                 | 0.07                  |
| G4(MP2)//MN15/b         | 2.83                  | G4// MN12-SX/b               | 2.88                  |
| G4(MP2)//M11-L /b       | 1.27                  | G4// MN15-L/b                | 1.63                  |
| G4(MP2)//M08-HX/b       | 3.02                  | G4// $\omega$ B97X-D/b       | 2.97                  |
| G4(MP2)//PW6B95/b       | 0.96                  | G4//SOGGA11/b                | 0.96                  |
| G4(MP2)//BMK/b          | 3.35                  | G4//CAM-B3LYP/b              | 2.43                  |

**Table S8.** Rate constants (in  $\text{cm}^3 \text{ molecule}^{-1} \text{ s}^{-1}$ ) calculated for the  $\text{CCl}_2 + \text{NO}_2 \rightarrow \text{CCl}_2\text{O} + \text{NO}$  reaction (channel 2a) at 300 K using the energetics derived from the G4//DFT/6-311+G(3*df*) level of theory. The employed barrier heights are listed in Table S7 of the Supplementary Information.

| Level of theory | $k_{2,\infty}$         | Level of theory      | $k_{2,\infty}$         |
|-----------------|------------------------|----------------------|------------------------|
| G4//M06-2X      | $2.38 \times 10^{-16}$ | G4//MN15             | $3.24 \times 10^{-16}$ |
| G4//M11-L       | $1.47 \times 10^{-14}$ | G4//M08-HX           | $2.36 \times 10^{-16}$ |
| G4//PW6B95      | $2.70 \times 10^{-14}$ | G4//BMK              | $4.67 \times 10^{-16}$ |
| G4//MN12-SX     | $3.41 \times 10^{-16}$ | G4//CAM-B3LYP        | $1.79 \times 10^{-15}$ |
| G4//MN12-L      | $3.32 \times 10^{-16}$ | G4// $\omega$ B97X-D | $6.41 \times 10^{-16}$ |
| G4//MN15-L      | $1.92 \times 10^{-15}$ | G4//SOGGA11          | $4.40 \times 10^{-14}$ |

**Table S9.** Rate constants (in  $\text{cm}^3 \text{ molecule}^{-1} \text{ s}^{-1}$ ) calculated for the  $\text{CCl}_2 + \text{NO}_2 \rightarrow \text{CCl}_2\text{O} + \text{NO}$  reaction (channel 2) at 300-2000 K employing the G4//DFT/6-311+G(3df) level of theory (DFT = M06-2X, M08-HX, PW6B95, BMK, MN12-L, MN12-SX, MN15-L,  $\omega$ B97X-D, SOGGA11, M11-L, CAM-B3LYP).

| T [K] | $k_{2,\infty}$         |                        |                        |                        |                        |
|-------|------------------------|------------------------|------------------------|------------------------|------------------------|
|       | M06-2X                 | M08-HX                 | PW6B95                 | BMK                    | MN12-L                 |
| 300   | $2.38 \times 10^{-16}$ | $2.36 \times 10^{-16}$ | $2.70 \times 10^{-14}$ | $4.67 \times 10^{-16}$ | $3.32 \times 10^{-16}$ |
| 400   | $1.28 \times 10^{-15}$ | $1.20 \times 10^{-15}$ | $6.89 \times 10^{-14}$ | $2.91 \times 10^{-15}$ | $5.85 \times 10^{-16}$ |
| 500   | $4.07 \times 10^{-15}$ | $3.69 \times 10^{-15}$ | $1.41 \times 10^{-13}$ | $1.01 \times 10^{-14}$ | $9.57 \times 10^{-16}$ |
| 600   | $9.73 \times 10^{-15}$ | $8.64 \times 10^{-15}$ | $2.50 \times 10^{-13}$ | $2.56 \times 10^{-14}$ | $1.47 \times 10^{-15}$ |
| 700   | $1.95 \times 10^{-14}$ | $1.70 \times 10^{-14}$ | $4.06 \times 10^{-13}$ | $5.35 \times 10^{-14}$ | $2.14 \times 10^{-15}$ |
| 800   | $3.47 \times 10^{-14}$ | $3.00 \times 10^{-14}$ | $6.17 \times 10^{-13}$ | $9.82 \times 10^{-14}$ | $3.01 \times 10^{-15}$ |
| 900   | $5.67 \times 10^{-14}$ | $4.85 \times 10^{-14}$ | $8.90 \times 10^{-13}$ | $1.64 \times 10^{-13}$ | $4.08 \times 10^{-15}$ |
| 1000  | $8.69 \times 10^{-14}$ | $7.38 \times 10^{-14}$ | $1.24 \times 10^{-12}$ | $2.57 \times 10^{-13}$ | $5.39 \times 10^{-15}$ |
| 1100  | $1.27 \times 10^{-13}$ | $1.07 \times 10^{-13}$ | $1.66 \times 10^{-12}$ | $3.80 \times 10^{-13}$ | $6.96 \times 10^{-15}$ |
| 1200  | $1.77 \times 10^{-13}$ | $1.49 \times 10^{-13}$ | $2.17 \times 10^{-12}$ | $5.39 \times 10^{-13}$ | $8.81 \times 10^{-15}$ |
| 1300  | $2.41 \times 10^{-13}$ | $2.01 \times 10^{-13}$ | $2.78 \times 10^{-12}$ | $7.39 \times 10^{-13}$ | $1.10 \times 10^{-14}$ |
| 1400  | $3.18 \times 10^{-13}$ | $2.65 \times 10^{-13}$ | $3.49 \times 10^{-12}$ | $9.84 \times 10^{-13}$ | $1.34 \times 10^{-14}$ |
| 1500  | $4.10 \times 10^{-13}$ | $3.41 \times 10^{-13}$ | $4.32 \times 10^{-12}$ | $1.28 \times 10^{-12}$ | $1.63 \times 10^{-14}$ |
| 1600  | $5.19 \times 10^{-13}$ | $4.30 \times 10^{-13}$ | $5.26 \times 10^{-12}$ | $1.63 \times 10^{-12}$ | $1.95 \times 10^{-14}$ |
| 1700  | $6.47 \times 10^{-13}$ | $5.34 \times 10^{-13}$ | $6.34 \times 10^{-12}$ | $2.04 \times 10^{-12}$ | $2.31 \times 10^{-14}$ |
| 1800  | $7.94 \times 10^{-13}$ | $6.54 \times 10^{-13}$ | $7.55 \times 10^{-12}$ | $2.52 \times 10^{-12}$ | $2.71 \times 10^{-14}$ |
| 1900  | $9.62 \times 10^{-13}$ | $7.92 \times 10^{-13}$ | $8.91 \times 10^{-12}$ | $3.07 \times 10^{-12}$ | $3.16 \times 10^{-14}$ |
| 2000  | $1.15 \times 10^{-12}$ | $9.47 \times 10^{-13}$ | $1.04 \times 10^{-11}$ | $3.70 \times 10^{-12}$ | $3.66 \times 10^{-14}$ |

**Table S9 (cont).** Rate constants (in  $\text{cm}^3 \text{ molecule}^{-1} \text{ s}^{-1}$ ) calculated for the  $\text{CCl}_2 + \text{NO}_2 \rightarrow \text{CCl}_2\text{O} + \text{NO}$  reaction (channel 2) at 300-2000 K employing the G4//DFT/6-311+G(3df) level of theory (DFT = M06-2X, M08-HX, PW6B95, BMK, MN12-L, MN12-SX, MN15-L,  $\omega$ B97X-D, SOGGA11, M11-L, CAM-B3LYP).

| T<br>[K] | $k_{2,\infty}$         |                        |                        |                        |                        |                        |
|----------|------------------------|------------------------|------------------------|------------------------|------------------------|------------------------|
|          | MN12-SX                | MN15-L                 | $\omega$ B97X-D        | SOGGA11                | M11-L                  | CAM-B3LYP              |
| 300      | $3.41 \times 10^{-16}$ | $1.92 \times 10^{-15}$ | $6.41 \times 10^{-16}$ | $4.40 \times 10^{-14}$ | $1.47 \times 10^{-14}$ | $1.79 \times 10^{-15}$ |
| 400      | $1.90 \times 10^{-15}$ | $6.33 \times 10^{-15}$ | $3.69 \times 10^{-15}$ | $1.19 \times 10^{-13}$ | $4.02 \times 10^{-14}$ | $8.40 \times 10^{-15}$ |
| 500      | $6.21 \times 10^{-15}$ | $1.51 \times 10^{-14}$ | $1.22 \times 10^{-14}$ | $2.51 \times 10^{-13}$ | $8.55 \times 10^{-14}$ | $2.46 \times 10^{-14}$ |
| 600      | $1.51 \times 10^{-14}$ | $2.97 \times 10^{-14}$ | $3.01 \times 10^{-14}$ | $4.56 \times 10^{-13}$ | $1.57 \times 10^{-13}$ | $5.58 \times 10^{-14}$ |
| 700      | $3.07 \times 10^{-14}$ | $5.19 \times 10^{-14}$ | $6.16 \times 10^{-14}$ | $7.52 \times 10^{-13}$ | $2.59 \times 10^{-13}$ | $1.08 \times 10^{-13}$ |
| 800      | $5.51 \times 10^{-14}$ | $8.32 \times 10^{-14}$ | $1.11 \times 10^{-13}$ | $1.16 \times 10^{-12}$ | $4.00 \times 10^{-13}$ | $1.86 \times 10^{-13}$ |
| 900      | $9.07 \times 10^{-14}$ | $1.25 \times 10^{-13}$ | $1.84 \times 10^{-13}$ | $1.68 \times 10^{-12}$ | $5.84 \times 10^{-13}$ | $2.96 \times 10^{-13}$ |
| 1000     | $1.40 \times 10^{-13}$ | $1.80 \times 10^{-13}$ | $2.84 \times 10^{-13}$ | $2.35 \times 10^{-12}$ | $8.18 \times 10^{-13}$ | $4.46 \times 10^{-13}$ |
| 1100     | $2.05 \times 10^{-13}$ | $2.49 \times 10^{-13}$ | $4.16 \times 10^{-13}$ | $3.18 \times 10^{-12}$ | $1.11 \times 10^{-12}$ | $6.39 \times 10^{-13}$ |
| 1200     | $2.88 \times 10^{-13}$ | $3.34 \times 10^{-13}$ | $5.86 \times 10^{-13}$ | $4.18 \times 10^{-12}$ | $1.46 \times 10^{-12}$ | $8.84 \times 10^{-13}$ |
| 1300     | $3.92 \times 10^{-13}$ | $4.36 \times 10^{-13}$ | $7.99 \times 10^{-13}$ | $5.38 \times 10^{-12}$ | $1.88 \times 10^{-12}$ | $1.18 \times 10^{-12}$ |
| 1400     | $5.19 \times 10^{-13}$ | $5.57 \times 10^{-13}$ | $1.06 \times 10^{-12}$ | $6.78 \times 10^{-12}$ | $2.38 \times 10^{-12}$ | $1.55 \times 10^{-12}$ |
| 1500     | $6.72 \times 10^{-13}$ | $7.00 \times 10^{-13}$ | $1.37 \times 10^{-12}$ | $8.41 \times 10^{-12}$ | $2.95 \times 10^{-12}$ | $1.98 \times 10^{-12}$ |
| 1600     | $8.52 \times 10^{-13}$ | $8.64 \times 10^{-13}$ | $1.74 \times 10^{-12}$ | $1.03 \times 10^{-11}$ | $3.62 \times 10^{-12}$ | $2.49 \times 10^{-12}$ |
| 1700     | $1.06 \times 10^{-12}$ | $1.05 \times 10^{-12}$ | $2.17 \times 10^{-12}$ | $1.24 \times 10^{-11}$ | $4.37 \times 10^{-12}$ | $3.08 \times 10^{-12}$ |
| 1800     | $1.31 \times 10^{-12}$ | $1.27 \times 10^{-12}$ | $2.67 \times 10^{-12}$ | $1.48 \times 10^{-11}$ | $5.22 \times 10^{-12}$ | $3.76 \times 10^{-12}$ |
| 1900     | $1.59 \times 10^{-12}$ | $1.51 \times 10^{-12}$ | $3.25 \times 10^{-12}$ | $1.75 \times 10^{-11}$ | $6.18 \times 10^{-12}$ | $4.53 \times 10^{-12}$ |
| 2000     | $1.90 \times 10^{-12}$ | $1.78 \times 10^{-12}$ | $3.90 \times 10^{-12}$ | $2.05 \times 10^{-11}$ | $7.25 \times 10^{-12}$ | $5.41 \times 10^{-12}$ |

**Table S10.** Lennard-Jones parameters for various gases [3].

| $M$            | $\sigma$ [Å] | $\epsilon/k_B$<br>[K] |
|----------------|--------------|-----------------------|
| He             | 2.52         | 9.87                  |
| Ne             | 2.60         | 75.75                 |
| Ar             | 3.32         | 143.78                |
| Kr             | 3.52         | 207.44                |
| Xe             | 3.90         | 262.68                |
| H <sub>2</sub> | 2.78         | 64.00                 |
| N <sub>2</sub> | 3.70         | 84.94                 |
| O <sub>2</sub> | 3.39         | 121.74                |

**Table S11.** Parameters required for the calculation of the rate constant  $k_{1,0}$ .  $Z_{LJ}$  in  $\text{cm}^3$  molecule $^{-1}$  s $^{-1}$ .  $k_{1,0}$  in  $\text{cm}^6$  molecule $^{-2}$  s $^{-1}$ ,  $K_c$  in molecule  $\text{cm}^{-3}$ .  $T$  in K.  $\epsilon_{\text{CCl}_2\text{NO}_2}/k_B = 320$  K,  $\sigma_{\text{CCl}_2\text{NO}_2} = 5.35$  Å,  $\epsilon_{\text{He}}/k_B = 9.87$  K and  $\sigma_{\text{He}} = 2.52$  Å [3],  $\epsilon_{\text{Ar}}/k_B = 143.78$  K and  $\sigma_{\text{Ar}} = 3.32$  Å [3],  $\epsilon_{\text{Kr}}/k_B = 207.44$  K and  $\sigma_{\text{Kr}} = 3.52$  Å [3],  $\epsilon_{\text{N}_2}/k_B = 84.94$  K and  $\sigma_{\text{N}_2} = 3.70$  Å [3].  $E_0 = 42.6$  kcal mol $^{-1}$ ,  $\rho_{\text{vib,h}}(E_0) = 1.30 \times 10^8$  (kcal mol $^{-1}$ ) $^{-1}$  and  $F_{\text{anh}} = 1.30$ .

| $T$  | $Z_{LJ} \times 10^{10}$ | $Q_{\text{vib}}$   | $F_E$ | $F_{\text{rot}}$ | $F_{\text{rotint}}$ | $K_c$                 | $\beta_c$ | $k_{1,0}$                                |
|------|-------------------------|--------------------|-------|------------------|---------------------|-----------------------|-----------|------------------------------------------|
| 300  | 5.93                    | 4.02               | 1.14  | 3.14             | 6.94                | $8.00 \times 10^{-4}$ | 0.18      | [He] $6.72 \times 10^{-29}$              |
|      | 3.75                    |                    |       |                  |                     |                       |           | [Ar] $4.24 \times 10^{-29}$              |
|      | 3.24                    |                    |       |                  |                     |                       |           | [Kr] $3.67 \times 10^{-29}$              |
|      | 4.31                    |                    |       |                  |                     |                       |           | [N <sub>2</sub> ] $4.88 \times 10^{-29}$ |
| 500  | 6.84                    | 19.83              | 1.25  | 2.91             | 4.46                | $2.3 \times 10^9$     | 0.11      | [He] $5.31 \times 10^{-30}$              |
|      | 4.11                    |                    |       |                  |                     |                       |           | [Ar] $3.20 \times 10^{-30}$              |
|      | 3.53                    |                    |       |                  |                     |                       |           | [Kr] $2.74 \times 10^{-30}$              |
|      | 4.79                    |                    |       |                  |                     |                       |           | [N <sub>2</sub> ] $3.73 \times 10^{-30}$ |
| 1000 | 8.44                    | $7.21 \times 10^2$ | 1.63  | 2.37             | 2.16                | $2.45 \times 10^{18}$ | 0.051     | [He] $6.83 \times 10^{-32}$              |
|      | 4.84                    |                    |       |                  |                     |                       |           | [Ar] $3.91 \times 10^{-32}$              |
|      | 4.11                    |                    |       |                  |                     |                       |           | [Kr] $3.32 \times 10^{-32}$              |
|      | 5.71                    |                    |       |                  |                     |                       |           | [N <sub>2</sub> ] $4.62 \times 10^{-32}$ |
| 1500 | 9.63                    | $1.25 \times 10^4$ | 2.23  | 1.98             | 1.37                | $1.45 \times 10^{21}$ | 0.027     | [He] $3.38 \times 10^{-33}$              |
|      | 5.40                    |                    |       |                  |                     |                       |           | [Ar] $1.89 \times 10^{-33}$              |
|      | 4.56                    |                    |       |                  |                     |                       |           | [Kr] $1.60 \times 10^{-33}$              |
|      | 6.40                    |                    |       |                  |                     |                       |           | [N <sub>2</sub> ] $2.25 \times 10^{-33}$ |
| 2000 | 10.6                    | $1.25 \times 10^5$ | 3.25  | 1.70             | 1.00                | $2.68 \times 10^{22}$ | 0.015     | [He] $3.35 \times 10^{-34}$              |
|      | 5.86                    |                    |       |                  |                     |                       |           | [Ar] $1.86 \times 10^{-34}$              |
|      | 4.94                    |                    |       |                  |                     |                       |           | [Kr] $1.56 \times 10^{-34}$              |
|      | 6.97                    |                    |       |                  |                     |                       |           | [N <sub>2</sub> ] $2.21 \times 10^{-34}$ |

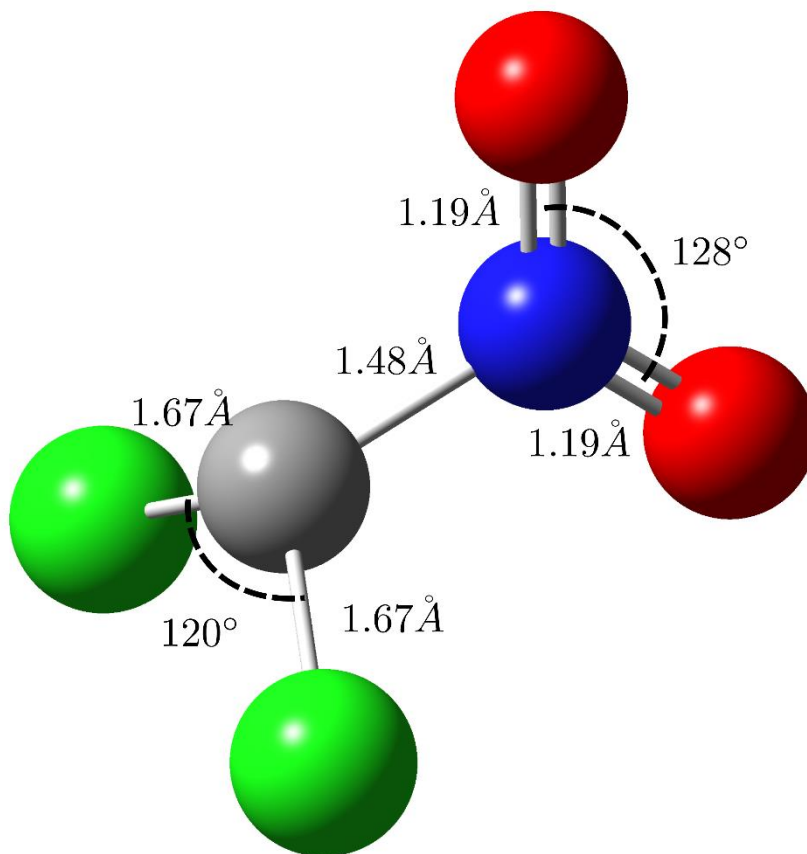

**Figure S6.** Molecular geometry of the  $\text{CCl}_2\text{NO}_2$  isomerization transition state calculated at the M11-L/6-311+G(3*df*) level of theory.

**Table S12.** Modified Kassel parameters and strong collision central broadening factor as a function of the temperature (in K) for the reaction  $\text{CCl}_2 + \text{NO}_2 \rightarrow \text{CCl}_2\text{NO}_2$ .

| $T$  | $s_k$ | $b_k$ | $F_{\text{cent}}^{SC}$ |
|------|-------|-------|------------------------|
| 300  | 4.1   | 12.2  | 0.45                   |
| 500  | 5.7   | 13.9  | 0.30                   |
| 1000 | 7.9   | 12.9  | 0.23                   |
| 1500 | 9.0   | 10.9  | 0.27                   |
| 2000 | 9.7   | 9.3   | 0.34                   |

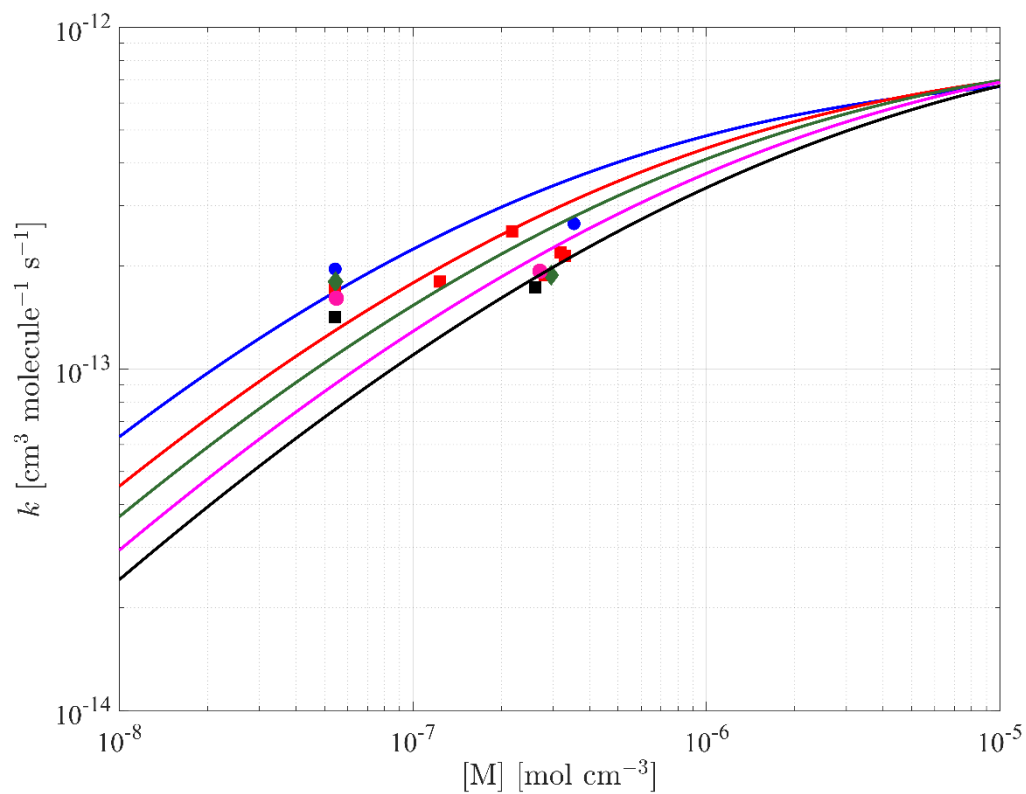

**Figure S7.** Falloff curves for  $\text{CCl}_2 + \text{NO}_2 + \text{M} \rightarrow \text{CCl}_2\text{NO}_2 + \text{M}$  reaction. Solid lines: Results of the calculations of the present work, from up to down  $T = 266, 298, 318, 340$  and  $360$  K. Experimental results of Eskola et al. [2]:  $\bullet$  266,  $\blacksquare$  298,  $\blacklozenge$  318,  $\bullet$  340, and  $\blacksquare$  360 K.

## Convergence criteria for geometry optimizations and transition state search

The default configuration of Gaussian16 was used in the implementation of the Self Consistent Field (SCF) method. Direct Inversion in the Iterative Subspace extrapolation method [4] was employed in the determination of the molecular orbitals, and convergence criteria were set to a density matrix root mean square change less than  $10^{-8}$ , and maximum change in the density matrix less than  $10^{-6}$ . Minimizations (optimizations to a local minimum) and optimizations to transition states were performed with the Berny algorithm in redundant internal coordinates. Convergence was tested against criteria for the maximum force component, root-mean square force, maximum step component, and root-mean-square step. The specific convergence criteria used by Gaussian 16 are:

- 1- The maximum component of the force must be below the cutoff value of 0.00045 hartree/bohr.
- 2- The root-mean-square of the forces must be below the defined tolerance of 0.0003 hartree/bohr.
- 3- The calculated maximum displacement for the next step must be smaller than the defined threshold value of 0.0018 bohr.
- 4- The root-mean-square of the displacement for the next step must be below its cutoff value of 0.0012 bohr.

## References

- [1] L. A. Curtiss, P. C. Redfern and K. Raghavachari, *J. Chem. Phys.*, 2007, **126**, 084108-1.
- [2] A. J. Eskola, I. Golonka, M. P. Rissanen and R. S. Timonen, *Chem. Phys. Lett.*, 2008, **460**, 401.
- [3] A. B. Weaver and A. A. Alexeenko, *J. Phys. Chem. Ref. Data* 2015, **44**, 023103.
- [4] P. Pulay, *J. Comp. Chem.*, 1982, **3**, 556-60.
